Learning and motivation in transgenic mice

## 1                   **Similar visual perception in GCaMP6 transgenic mice** 2                   **despite differences in learning and motivation**

3  
4 Peter A. Groblewski<sup>1,3</sup>, Douglas R. Ollerenshaw<sup>1,3</sup>, Justin Kiggins<sup>1,2</sup>, Marina Garrett<sup>1</sup>, Chris  
5 Mochizuki<sup>1</sup>, Linzy Casal<sup>1</sup>, Sissy Cross<sup>1</sup>, Kyla Mace<sup>1</sup>, Jackie Swapp<sup>1</sup>, Sahar Manavi<sup>1</sup>, Derric  
6 Williams<sup>1</sup>, Stefan Mihalas<sup>1</sup>, Shawn R. Olsen<sup>1</sup>

7  
8 1. Allen Institute for Brain Science, Seattle, WA 98103, USA

9 2. Current address: Chan Zuckerberg Initiative, CA

10 3. Co-lead authors

11 Correspondence: [peterg@alleninstitute.org](mailto:peterg@alleninstitute.org), [shawno@alleninstitute.org](mailto:shawno@alleninstitute.org)

### 12 13 14 **Abstract**

15 To study mechanisms of perception and cognition, neural measurements must be made during  
16 behavior. A goal of the *Allen Brain Observatory* is to map activity in distinct cortical cell classes  
17 during visual processing and behavior. Here we characterize learning and performance of five  
18 GCaMP6-expressing transgenic lines trained on a visual change detection task. We used  
19 automated training procedures to facilitate comparisons across mice. Training times varied, but  
20 most transgenic mice learned the task. Motivation levels also varied across mice. To compare  
21 mice in similar motivational states we subdivided sessions into over-, under-, and optimally  
22 motivated periods. When motivated, the pattern of perceptual decisions were highly correlated  
23 across transgenic lines, although overall d-prime was lower in one line labeling somatostatin  
24 inhibitory cells. These results provide important context for using these mice to map neural  
25 activity underlying perception and behavior.

## Learning and motivation in transgenic mice

### 26 **Introduction**

27 Goal-oriented behavior requires coordinated neural activity across brain regions, but the cellular  
28 mechanisms mediating these activity dynamics are not fully understood. The mouse provides  
29 unique opportunities to dissect cell type- and circuit-specific mechanisms of perception and  
30 behavior (Luo et al., 2018, 2008; Niell, 2015). Head-fixed behaviors are well-established and  
31 allow precise measurements of cellular activity using 2-photon imaging and electrode recordings,  
32 in addition to optogenetic perturbations (Andermann et al., 2010; Burgess et al., 2017; Z. V. Guo  
33 et al., 2014; Histed et al., 2012; O'Connor et al., 2010). Applications of these methods are  
34 revealing mechanisms of perception and action across multiple sensory modalities and cognitive  
35 systems (Chen et al., 2013; Glickfeld et al., 2013; Goard et al., 2016; Z. Guo et al., 2014; Harvey  
36 et al., 2012; Huber et al., 2012; Li et al., 2016; O'Connor et al., 2013; Peron et al., 2015;  
37 Petreanu et al., 2012; Pinto et al., 2013; Poort et al., 2015; Resulaj et al., 2018).

38  
39 At the Allen Institute for Brain Science we seek to generate a database of cell type-specific  
40 activity across visual cortical areas during visual stimulation and behavior (Koch and Reid,  
41 2012). We developed a standardized physiological pipeline—the *Allen Brain Observatory*—to  
42 monitor cellular population activity during passive visual stimulation in mice (de Vries et al.,  
43 2019). To expand on these passive viewing datasets, we are adapting our existing pipeline to  
44 include recordings from mice performing visually-guided behaviors. For large-scale pipeline  
45 compatibility we seek tasks that are simple yet adaptable to more complex variants, easily  
46 learned, and consistently performed. Candidate tasks must also support head-fixed physiological  
47 measurements using our standardized instruments.

48  
49 In this study we test a go/no-go visual change detection task. Change detection is a fundamental  
50 behavioral capacity of animals and humans (Elmore et al., 2011; Hagmann and Cook, 2013;  
51 Pearson and Platt, 2013; Rensink, 2002), and the visual cortex of mice and primates is implicated  
52 in the detection of changes in visual features (Brunet et al., 2014; Glickfeld et al., 2013;  
53 Womelsdorf et al., 2006). The core task we use can be used to test perception of various visual  
54 features including orientation, contrast, color, and natural images (Denman et al., 2018; Garrett  
55 et al., 2020; Glickfeld et al., 2013). Moreover, our task includes features that permit investigation  
56 of the physiological correlates of behavior and cognition. For instance, the ability of mice to  
57 generalize to new stimuli allows for exploration of stimulus novelty and learning, and the regular  
58 temporal structure of the task allows for exploration of deviations from expected timing (Garrett  
59 et al., 2020). Additionally, the delay between stimulus presentations provides a test of short-term  
60 memory. Finally, variability in task-engagement and motivation provides a window into state-  
61 dependent processing.

62  
63 To support future studies of neurophysiology during this versatile task, we characterize the  
64 behavior of five Cre driver x GCaMP6 reporter transgenic mouse lines that label subpopulations  
65 of excitatory or inhibitory cells—these allow cell class-specific activity mapping (de Vries et al.,

## Learning and motivation in transgenic mice

66 2020; Garrett et al., 2020; Madisen et al., 2015). To mitigate sources of variability in behavior  
67 and facilitate inter-mouse comparisons we used automated training procedures to progress mice  
68 through a series of increasingly difficult training stages.

69  
70 Even in well-trained subjects, psychophysical performance can be non-stationary over a  
71 behavioral session, varying with motivation, attention, confusion, and other factors (Andermann  
72 et al., 2010; Berditchevskaia et al., 2016; Carandini and Churchland, 2013; Mcginley et al.,  
73 2015). Tasks using water restriction, as in our study, are subject to motivational changes due to  
74 decreasing thirst as water is consumed during the session. Studies often only consider average  
75 performance over the session or restrict session duration to avoid major motivational changes.  
76 Here, all mice completed one-hour sessions, independent of mouse performance and  
77 experimenter intervention. Inspired by a recent study of motivation dynamics in mice performing  
78 a go/no-go task (Berditchevskaia et al., 2016), we use the signal detection theory metric,  
79 ‘criterion’, to help categorize epochs in the session as over-motivated, motivated, and under-  
80 motivated. Parsing behavior sessions according to motivation level helps to compare behavior  
81 and physiology across mice and transgenic lines under more controlled conditions.

82  
83 Overall, each of the transgenic mouse lines we tested could be trained with automated algorithms  
84 to reach high performance levels, although training times varied across mice, and in some cases  
85 across lines. Additionally, we observed motivational and overall performance (d-prime)  
86 differences in some lines. However, we show that the pattern of perceptual decisions is highly  
87 correlated across transgenic mice during epochs of matched motivation. These results provide a  
88 basis for systematic neural activity mapping using these transgenic mice.

89  
90

## 91 **Results**

92

### 93 **Visual change detection task with natural scene images**

94 We trained mice (n = 60) to perform a visual change detection task with natural scene images  
95 chosen from the *Allen Brain Observatory* battery of visual stimuli ([http://observatory.brain-](http://observatory.brain-map.org/visualcoding)  
96 [map.org/visualcoding](http://observatory.brain-map.org/visualcoding)). In this go/no-go task, mice see a continuous series of briefly presented  
97 images and they earn water rewards by correctly reporting when the identity changes (Figure 1).  
98 Responses are indicated by licking a water spout within a 600 ms response window following the  
99 image change (Figure 1A,B). On randomly interleaved ‘catch’ trials, no image change occurs  
100 and the mouse must withhold licking to avoid a time-out (Figure 1A,B). Licks that came before  
101 the randomly selected change time on a given trial resulted in that trial being aborted, leading to  
102 a short timeout followed by a reset of the trial clock (see Supplementary Figures 1 and 2 for  
103 detailed task flow). Once trained, mice display short latency reaction times with the majority of  
104 responses occurring within the response window (Figure 1C).

105

## Learning and motivation in transgenic mice

106 In our behavioral apparatus, mice are head-fixed yet free to run on a circular disc. Running is  
107 monitored but does not influence task flow. Most, but not all, mice ran or walked during the  
108 behavioral session, and these mice typically stopped running when responding to stimulus  
109 changes and to consume the water reward (Supplementary Figure 2).

110

### 111 **Automated behavior training of transgenic mice**

112 We assessed training and performance of five transgenic mouse lines expressing GCaMP6f in  
113 distinct subsets of cortical cells (*Cux2*: *Cux2-CreERT2*; *Camk2a-tTA*; *Ai93(TITL-GCaMP6f)*,  
114 *n*=4; *Rbp4*: *Rbp4-Cre\_KL100*; *Camk2a-tTA*; *Ai93(TITL-GCaMP6f)*, *n*=12; *Slc17a7*: *Slc17a7-*  
115 *IRES2-Cre*; *Camk2a-tTA*; *Ai93(TITL-GCaMP6f)*, *n*=23; *Sst*: *Sst-IRES-Cre*; *Ai148(TIT2L-GC6f-*  
116 *ICL-tTA2)*, *n*=7; *Vip*: *Vip-IRES-Cre*; *Ai148(TIT2L-GC6f-ICL-tTA2)*, *n*=14). To train these  
117 transgenic mice (*Cux2*, *Rbp4*, *Slc17a7*, *Sst*, *Vip*) in a standardized manner, we developed an  
118 automated protocol in which mice progress through a series of training stages with parameters,  
119 performance requirements, and stage transitions defined in software rather than relying on  
120 experimenter intervention (Figure 2A; see Methods).

121

122 Mice first learn the task with oriented gratings and no intervening gray period between stimuli.  
123 After reaching performance requirements on the orientation task, a 500 ms inter-stimulus gray  
124 period is introduced. In the final training stage, the grating stimuli are replaced with natural  
125 scene images. The majority of mice (47/60) completed the full set of training stages within 15  
126 sessions, and 56/60 mice reached the final stage within 40 sessions (Figure 2B). The average  
127 time to reach the final training stage varied across genotypes (Figure 2C; *Cux2*, 4.0±0.8; *Rbp4*,  
128 4.9±1.4; *Slc* 6.6±3.5; *Sst*, 6.5±2.6, *Vip*, 19.0±10.9), and there was a significant main effect of  
129 genotype on training times ( $H=22.98$ ,  $p=0.0001$ ). Post-hoc, pairwise comparisons showed *Vip*  
130 transgenic mice were slower to train than the *Slc* ( $p=0.0002$ ), *Rbp4* ( $p=0.0005$ ), and *Cux2* groups  
131 ( $p=0.003$ ). Thus, all genotypes were able to learn the task, but the number of sessions to do so  
132 varied.

133

134 All subsequent data analysis is restricted to sessions in the final training stage (stage 3) in which  
135 mice had peak hit rate and d-prime values (both calculated over a rolling 100 trial window) of at  
136 least 0.3 and 1.0, respectively, and had at least 50 correct responses on hit trials. Of 1319  
137 sessions in the final training stage, 1100 met these performance criteria. Of the 60 mice in the  
138 study, 56 mice had at least one stage 3 session (median = 21, mean = 19.7, standard deviation =  
139 11.3, min=1, max = 37). Supplemental Table 1 provides a detailed summary of the mice  
140 described in this study, including the number of sessions analyzed.

141

### 142 **Variation in motivation**

143 In typical behavior sessions, mice were very responsive early but became less task-engaged later  
144 in the hour-long session. During these periods of reduced task-engagement, mice licked only

## Learning and motivation in transgenic mice

145 infrequently, or ceased licking altogether, indicating that motivation to perform the task  
146 decreased (Figure 3A).

147  
148 We quantified changes in motivation using the ‘criterion’ parameter from signal detection theory  
149 ( $-0.5*[z(\text{HR})+z(\text{FA})]$ ). Criterion is a measure of the subject’s internal bias to respond. Higher  
150 values correspond to more conservative response criteria and correspondingly lower response  
151 rates. To aid visualizations we represent criterion with the sign inverted, thus mapping states of  
152 low motivation to lower values and states of high motivation to higher values. To capture  
153 motivation changes over the course of the behavioral session, we computed criterion in ten-  
154 minute epochs. On average, mice showed decreasing motivation over the course of the one-hour  
155 session (Figure 3B,C), but we observed a range of motivation levels across mice and genotypes  
156 (Figure 3D).

157  
158 To compare mouse behavior during similar motivational states, we subdivided behavioral  
159 sessions into epochs labeled ‘over motivated’ (criterion  $> 1.25$ ), ‘motivated’ ( $-1.25 \leq \text{criterion} \leq$   
160  $1.25$ ), and ‘under motivated’ (criterion  $< -1.25$ ) (Figure 3E). A small percentage of epochs  
161 (1.2%) were not assigned a criterion value due to insufficient presentations of GO and/or  
162 CATCH trials in 10-minute epoch (Supplemental Table 1). Mice spent the majority of their time  
163 in the ‘motivated’ state (Figure 3F), however, there was a significant interaction between  
164 genotype and state ( $F(8,102)=4.87, p<0.0001$ ). Follow-up, within-genotype pairwise  
165 comparisons indicated that all but the *Vip* and *Sst* groups spent significantly more time in the  
166 motivated state than in the under-motivated state ( $p < 0.01$  for comparisons in *Cux2*, *Rbp4*, and  
167 *Slc17a7* groups).

168  
169 The consistent progression from over-motivation to under-motivation likely reflects waning  
170 engagement due to decreasing thirst in the session. Supporting this, licking reaction times  
171 (pooled across mice) were shortest when mice were over-motivated but longest when under-  
172 motivated (Figure 4A). Additionally, consumption lick counts (the number of licks in a 5 second  
173 window following reward delivery, which is a metric of response vigor) were highest when mice  
174 were over-motivated but lowest when under-motivated (Figure 4B) (Berditchevskaia et al.,  
175 2016).

### 176 177 **Behavioral performance varies with motivation**

178 The probability of a behavioral response (averaged over all images) varied with motivation  
179 levels, as expected from our criterion-based definition (Figure 4C). When over-motivated, both  
180 hit and false alarm rates were high. In the more optimal motivational range, hit rates were high  
181 but false alarm rates were low. Finally, when under-motivated, mice showed low hit and false  
182 alarm rates.

183

## Learning and motivation in transgenic mice

184 To assess psychophysical performance for each motivational state we computed d-prime values  
185 by pooling across all trials from all mice in matched motivational states in order to reduce the  
186 impact of epochs with low trial counts (which would provide less accurate estimates of d-prime).  
187 We found an inverted-U shape relationship between d-prime and motivation level (Figure 4D),  
188 consistent with both classic (Duffy, 1957; Yerkes and Dodson, 1908) and recent studies  
189 (Mcginley et al., 2015). We performed a series of pairwise hypothesis tests on the bootstrapped  
190 d-prime distributions (Saravanan et al., 2019) and report the bootstrapped probabilities ( $p_{boot}$ ). D-  
191 prime was greater in the motivated state than in both the under- and over-motivated states ( $p_{boot} <$   
192 0.001). Thus, periods of ‘optimal’ motivation corresponded to the highest performance as  
193 measured with d-prime. Supplemental Figure 3 illustrates how the relationship of d-prime and  
194 motivation varies with different criterion thresholds for defining motivational states.

195  
196 We next computed d-prime values in the motivated state separately for each genotype using the  
197 same bootstrap analysis described above. Motivated d-prime values were not significantly  
198 different across genotypes, except for the Sst group which had a lower d-prime compared to each  
199 of the other groups ( $p_{boot} < 0.001$ ).

200

### 201 **Highly correlated perception across transgenic lines in motivated state**

202 In the final stage of training (stage 3), mice perform the visual change detection with a set of 8  
203 natural scene images (Figure 5A). In total, mice see  $8 \times 8 = 64$  unique image-pair transitions (8 of  
204 these are no-change transitions, which define catch trials). On average, mice displayed a range of  
205 response probabilities to the 64 unique image pairs, indicating some transitions were more  
206 difficult than others (Figure 5B,C). This pattern of responses across image transitions reflects the  
207 mice’s perceptual landscape and this might differ across transgenic lines. Thus, we next sought  
208 to determine how similar was the pattern of behavioral responses across genotypes and whether  
209 this was motivation-dependent.

210

211 The rank order of the response probabilities for the 64 transitions were largely conserved across  
212 genotypes (Figure 5D), and each genotype’s pattern of behavioral responses correlated strongly  
213 with the average of all mice (Figure 5E;  $r$ -values of 0.93 to 0.99,  $p$ -values  $< 4E-29$ ). Moreover,  
214 each transgenic line strongly correlated with the others indicated by significant pairwise  
215 correlations between all possible pairs (Figure 5F;  $r$ -values of 0.82 to 0.97,  $p$ -values  $< 4E-7$ ). To  
216 compare the strength of these correlations across the three motivational states, we performed a  
217 bootstrapping analysis in which we used subsampling to match sample sizes of each transgenic  
218 line across motivational states (see Methods). We found that response correlations were highest  
219 in the optimally motivated state compared to over- and under-motivated states for all genotype  
220 combinations (Figure 5G, all  $p$ -values  $< 2.1E-164$ ).

221

222

223



## Learning and motivation in transgenic mice

### 224 **Discussion**

225

226 We set out to characterize learning and behavioral performance of multiple transgenic mouse  
227 lines on a visual change detection task and to further understand how variation in motivation  
228 influences performance once trained. Overall, our results show that despite some differences in  
229 learning and motivation, the five transgenic mouse lines we tested have highly correlated visual  
230 perception during optimally motivated states.

231

### 232 **Standardized behavior training of transgenic mice**

233 An overarching goal of this work is to establish standardized training protocols to implement a  
234 robust behavior pipeline for characterization of cellular physiology using our *Allen Brain*  
235 *Observatory*. The transgenic lines we tested allow measurement of activity in specific subsets of  
236 excitatory cells (Cux2-CreERT2: Layers 2/3, Rbp4-Cre\_KL100: Layer 5, Slc17a7-IRES2-Cre:  
237 Layers 1-6), and distinct inhibitory cell classes (Sst-IRES-Cre, Vip-IRES-Cre). As part of our  
238 development process it was important to anticipate experimental throughput by quantifying  
239 learning times and verifying robust task performance in these transgenic lines. Our results  
240 described here extend the basic phenotypic characterization of these transgenic lines (Daigle et  
241 al., 2018).

242

243 We trained all mice with an automated protocol that applied consistent parameters and task  
244 progression rules. All transgenic lines could be reliably trained in several weeks to perform the  
245 task using our protocol. Vip mice required significantly longer to reach the final stage of the task  
246 but performed at similar levels once trained. Additionally, although Sst mice learned the task  
247 quickly, they exhibited lower performance (d-prime) in the motivated state.

248

249 Future work can decipher the cause of learning, motivation, and performance differences in these  
250 transgenic lines, and whether it relates to neuronal GCaMP6 expression, developmental effects,  
251 and/or off-target effects on other brain or body systems. For instance, developmental disruption  
252 of Vip interneurons is known to impair perceptual learning in mice (Batista-Brito et al., 2017).  
253 Additionally, Sst transgenic mice have an increased incidence of health-related issues including a  
254 propensity for dermatitis (Allen Institute for Brain Science, 2016). Differences in task training  
255 times have been noted in other transgenic lines such as Vgat-ChR2 mice (Resulaj et al., 2018),  
256 which express channelrhodopsin in inhibitory neurons. Importantly, despite differences in  
257 learning and motivation, we found that perceptual decisions were very consistent across different  
258 lines when comparing matched motivational states.

259

### 260 **Motivation is non-stationary**

261 In most mice, motivation systematically decreased over each behavioral session. This likely  
262 represents a decrease in thirst-based motivation as water is consumed in the task. Consistent with  
263 this, we observed changes in licking behavior, including lick reaction time (lick latency) and

## Learning and motivation in transgenic mice

264 consumption lick count (response vigor), which have been linked to motivational changes  
265 (Berdichevskaia et al., 2016). Interestingly, recent work suggests a brain-wide network is  
266 involved in thirst regulated motivation (Allen et al., 2019). Thus, characterizing changes in  
267 thirst-based motivation will likely be important for interpreting neural activity measurements in  
268 tasks involving water reward.

269  
270 We used a metric from signal detection theory, ‘criterion’ (Green et al., 1966), to estimate  
271 motivation and to categorize states in the behavior sessions as over-motivated, motivated, or  
272 under-motivated. Future work can develop improved methods for identifying and quantifying  
273 behavioral states including generalized linear models and hidden Markov models (Calhoun et al.,  
274 2019; Wiltschko et al., 2015). These methods have the potential to provide a more powerful  
275 description of motivation, task-engagement, and other latent variables, and might also reduce the  
276 need for the temporal binning approach used here. In addition, they could help to explore how  
277 task contingencies and reinforcement structures affect motivation state and could provide insight  
278 into the factors that shape task learning, behavioral strategy, and ultimate performance levels.

279  
280 It will be important in future work to relate motivation to other behavioral and physiological  
281 states. Pupillometry measurements can reflect internal states including levels of arousal and task-  
282 engagement (Mcginley et al., 2015; Vinck et al., 2015). In addition, animal movements,  
283 including spontaneous actions and fidgets (Musall et al., 2019; Stringer et al., 2019), can be  
284 captured with whole body or face cameras and analysis of these behavioral data streams might  
285 provide additional quantitative correlates of motivation.

286

### 287 **Similar perception across transgenic mice**

288 We used our behavioral task to assess natural image change detection in transgenic mice. Expert  
289 mice can differentiate each of the unique combinations of natural images tested, although some  
290 image pair transitions are more difficult to distinguish than others, consistent with a  
291 target/distractor paradigm in mice (Yu et al., 2018). The mouse lines we tested here show  
292 correlated behavioral responses, and this correlation is very high when mice are compared under  
293 matched motivation states. Thus, these transgenic lines show similar patterns of perception  
294 despite some differences in learning rates, motivation dynamics, and d-prime values.

295

296 In forthcoming physiological experiments, we will measure neural activity in these mice to  
297 characterize cellular correlates of change perception, task-engagement, short-term working  
298 memory, and temporal expectation. In an initial study of layer 2/3 excitatory and Vip inhibitory  
299 cells in visual cortex, we found that excitatory cells provide selective image coding in the task,  
300 whereas Vip cells undergo dramatic changes in activity dynamics with learning (Garrett et al.,  
301 2020). Large-scale systematic mapping of activity in different cell classes across the brain will  
302 provide insights into how these interactions mediate neural processing to guide behavior and  
303 learning.



## Learning and motivation in transgenic mice

### 304 **Acknowledgements**

305 We thank the Allen Institute founder, Paul G. Allen, for his vision, encouragement and support.  
306 We thank Corbett Bennett, Sam Gale, Brian Hu, Jerome Lecoq, Stefan Mihalas, Alex Piet, Nick  
307 Ponvert, and Christof Koch for helpful discussions and feedback on the manuscript.

308

309

### 310 **Author contributions**

311 Conceptualization: S.R.O, P.A.G., D.R.O., S.M., J.K., M.G.

312 Supervision: S.R.O., P.A.G.

313 Data Collection: L.C., S.C., P.A.G., K.M., J.S.

314 Investigation, validation, methodology, and formal analyses: D.R.O., S.R.O, P.A.G., S.M., J.K.,

315 M.G.

316 Software: D.W., D.R.O., J.K.

317 Data Curation: D.R.O., J.K.

318 Visualization: D.R.O, P.A.G., J.K.

319 Original draft written by S.R.O, P.A.G., D.R.O with input from J.K.

320 All co-authors reviewed the manuscript.

321

322

### 323 **Competing interests**

324 The authors declare no competing interests.

## Learning and motivation in transgenic mice

### 325 **Methods**

326

#### 327 *Mice*

328 All experiments and procedures were performed in accordance with protocols approved by the  
329 Allen Institute Animal Care and Use Committee. Male and female transgenic mice expressing  
330 GCaMP6 in various Cre-defined cell populations were used in these experiments (Madisen et al.,  
331 2015). Mice were maintained on a reverse 12-hour light cycle (off at 9am, on at 9pm) and all  
332 experiments were performed during the dark cycle. [Table of mice used in experiments in  
333 Supplemental Table 1].

334

#### 335 *Surgery*

336 Headpost and cranial window surgery was performed on healthy mice that ranged in age from 5-  
337 12 weeks. Pre-operative injections of dexamethasone (3.2 mg/kg, S.C.) were administered at 12h  
338 and 3h before surgery. Mice were initially anesthetized with 5% isoflurane (1-3 min) and placed  
339 in a stereotaxic frame (Model# 1900, Kopf, Tujunga, CA), and isoflurane levels were maintained  
340 at 1.5-2.5% for surgery. An incision was made to remove skin. The exposed skull was levelled  
341 with respect to pitch (bregma-lambda level), roll, and yaw. The stereotax was zeroed at lambda  
342 using a custom headframe holder equipped with stylus affixed to a clamp-plate. The stylus was  
343 then replaced with the headframe to center the headframe well at 2.8 mm lateral and 1.3 mm  
344 anterior to lambda. The headframe was affixed to the skull with white Metabond and once dried,  
345 the mouse was placed in a custom clamp to position the skull at a rotated angle of 23° such that  
346 visual cortex was horizontal to facilitate the craniotomy. A circular piece of skull 5 mm in  
347 diameter was removed, and a durotomy performed. A coverslip stack (two 5 mm and one 7 mm  
348 glass coverslip adhered together) was cemented in place with Vetbond (Goldey et al., 2014).  
349 Metabond cement was applied around the cranial window inside the well to secure the glass  
350 window. Post-surgical brain health was documented using a custom photo-documentation  
351 system. One, two, and seven days following surgery mice were assessed for overall health  
352 (bright, alert, and responsive), cranial window clarity, and brain health. Upon successful  
353 recovery from surgery mice entered into behavioral training.

354

#### 355 *Behavior Training*

356 Water restriction and habituation: Throughout training mice were water-restricted to motivate  
357 learning and performance of behavioral task (Z. V. Guo et al., 2014). Prior to water restriction  
358 mice were weighed once daily for three days to obtain a stable, initial baseline weight. During  
359 the first week of water restriction mice were habituated to daily handling and increasing  
360 durations of head fixation in the behavior enclosure over a five-day period. The first day of  
361 behavior training began 10 days of water restriction. Mice were trained 5 days per week  
362 (Monday-Friday) and were allowed to earn unlimited water during the daily 1 hour sessions;  
363 supplements were provided if earned volume fell below 1.0mL and/or body weight fell under 80-  
364 85% of initial baseline weight. On non-training days mice were weighed and received water  
365 provision to reach their target weight, but never less than 1.0 mL per day).

366 Apparatus: Mice trained in custom-designed, sound-attenuating behavior enclosures equipped  
367 with a 24" gamma-corrected LCD monitor (ASUS, #PA248Q). Mice were head-fixed on a  
368 behavior stage with 6.5" running wheel tilted upwards by 10-15 degrees. The center of the visual  
369 monitor was placed 15 cm from the eye and visual stimuli were spherically warped to account  
370 for the variable distance from the eye toward the periphery of the monitor. Water rewards were

## Learning and motivation in transgenic mice

371 delivered using a solenoid (NI Research, #161K011) to deliver a calibrated volume of fluid  
372 through a blunted, 17g hypodermic needle (Hamilton) positioned approximately 2-3 mm away  
373 from the animal's mouth.

### 374 Change detection task:

375 *Overview:* Mice were trained for 1 hour/day, 5 days/week using a behavioral program  
376 implementing a go/no-go change detection task schematized in Figure 1. Briefly, mice were  
377 trained to lick a reward spout when the identity of a flashed visual stimulus changed identify. If  
378 mice responded correctly within a short, post-change response window (115-715ms) a water  
379 reward (5-10uL) was delivered. The four stages of the training protocol are shown in Table 1.

380

| Stage | Stimulus             | Stimulus Presentation               | Resp. Window (ms) | Contingent Rewards | Duration (min) |
|-------|----------------------|-------------------------------------|-------------------|--------------------|----------------|
| 0     | Square-wave gratings | Static                              | NA                | False              | 15             |
| 1     | Square-wave gratings | Static                              | 1                 | True               | 60             |
| 2     | Square-wave gratings | 250 ms stimulus; 500 ms gray period | 600               | True               | 60             |
| 3     | Natural Images       | 250 ms stimulus; 500 ms gray period | 600               | True               | 60             |

381

382 On Day 1 of the automated training protocol mice received a short, 15-min “open loop” session  
383 during which non-contingent water rewards were delivered coincident with 90° changes in  
384 orientation of a full-field, static square-wave grating (Stage 0). This session was intended to 1)  
385 introduce the mouse to the fluid delivery system and, 2) provide the technician an opportunity to  
386 identify the optimal lick spout position for each mouse. Each session thereafter was run in  
387 “closed loop”, and progressed through 3 phases of the operant task: 1) static, full-field square  
388 wave gratings (oriented at 0° and 90°, with the black/white transition always centered on the  
389 screen and the phase chosen randomly on every trial), 2) flashed, full-field square-wave gratings  
390 (0° and 90°, with phase as described in 1), and 3) flashed full-field natural scenes (8 natural  
391 images used in the *Allen Brain Observatory*).

392 *Progression through training stages:* Starting with Stage 1 mice were required to achieve  
393 a session maximum performance of at least  $d\text{-prime}=2$  (calculated over a rolling 100 trial  
394 window without trial count correction) during two of the last 3 sessions (Advancement Criteria).  
395 The fastest progression from Stage 1 to Stage 3 was 4 training days.

396 *Behavior session and trial structure:* Each behavior session consisted of a continuous  
397 series of trials, schematized in Supplemental Figure 1A. Briefly, prior to the start of each trial a  
398 trial-type and change-time were selected. Trial-type was chosen based on predetermined  
399 frequencies such that “GO” and “CATCH” trials occurred with predetermined probabilities. In  
400 stages 1 and 2, the catch probability was set at 25%, but no more than three consecutive trials of  
401 a given type were permitted, leading to an effective catch probability of ~36%. In stage 3, the  
402 catch probability was initially set at 12.5% (given that the 8 same-to-same changes represented  
403 8/64 possible image changes), which, combined with the maximum of 3 consecutive go/catch  
404 trial rule, led to an effective catch probability of ~30%. However, later sessions implemented a  
405 matrix sampling algorithm that ensured that each image transition was sampled equally, pushing  
406 the actual catch probability to ~12.5%. Change-times were selected from a truncated exponential  
407 distribution ranging from 2.25 to 8.25 seconds (mean of 4.25 seconds) following the start of a  
408 trial. Due to computational lag when aligning change-time with a stimulus flash, the actual  
409 distribution of change times was shifted to the right by one 750ms flash cycle (with only a small

## Learning and motivation in transgenic mice

410 fraction of changes occurring at 2.25 seconds) resulting in a mean change time of 4.2 seconds. In  
411 trials when a mouse licked prior to the stimulus change the trial was reset, and a timeout period  
412 was imposed. The number of times a trial could be reset before re-drawing the timing parameter  
413 was limited to five. In all, this trial structure leads to a sampling of “GO” and “CATCH” trials,  
414 that when combined with mouse responding, yields “HIT”, “MISS”, “FALSE ALARM”, and  
415 “CORRECT REJECTION” trials.

416 In addition to the four trial types described above, behavior sessions contained a subset of  
417 “free reward” trials (“GO” trials followed immediately by delivery of a non-contingent reward).  
418 Behavior sessions across all phases began with 5 “free-reward” trials. Additionally, in order to  
419 promote continued task performance throughout the behavior session in a subset of sessions  
420 “free reward” trials were delivered after 10 consecutive “MISS” trials.

421

### 422 *Data analysis*

423 Analysis was performed using custom scripts written in Python v3.7.5 (including Pandas  
424 v0.24.2, Numpy v1.16.4, Scipy v1.3.2 and Statsmodels v0.10.1) and GraphPad Prism (v8.0.1).  
425 Plots were generated using Matplotlib v3.1.1 and Seaborn v0.9.0.

426 Behavioral performance was quantified with the signal detection metrics of d-prime and  
427 criterion, which are both a function of hit and false alarm rates.

428 *Hit and false alarm rates:* The hit rate was calculated as the fraction of go-trials in which  
429 the mouse licked in a 0.115 to 0.715 second window following the display-lag-compensated  
430 image display time. Catch trials were defined as trials in which there was no image change.  
431 However, for calculation of the false alarm rate, a response window was defined following one  
432 of the flashes using the same statistics as in the go trials. False alarm rates were calculated as the  
433 fraction of catch-trials in which animal emitted a lick in this response window. Unless otherwise  
434 noted, hit and false alarm rates were corrected to account for trial counts using the following  
435 formula (Macmillan and Creelman, 2004):

436

$$437 \quad 1/(2N) \leq HR \leq (1-1/(2N)) \quad (1)$$

438

$$439 \quad 1/(2N) \leq FAR \leq (1-1/(2N)) \quad (2)$$

440

441 Where HR and FAR represent the hit and false alarm rates, and N represents the number of the  
442 respective trial type.

443 *D-prime (d')*: d-prime, which is a measure of the relative difference in response  
444 probabilities across the two trial types, is defined as:

445

$$446 \quad d\text{-prime} = Z(HR) - Z(FAR) \quad (3)$$

447

448 in which Z represents the inverse cumulative normal distribution function.

449 *Criterion:* Criterion, which is a measure of the underlying bias of the subject to emit a  
450 response, is defined as:

451

$$452 \quad C = -1/2(Z(HR) + Z(FAR)) \quad (4)$$

453

454 Criterion therefore varies from negative values for high response biases (high hit and false alarm  
455 rates) to positive numbers for low response biases (low hit and false alarm rates). In general, our

## Learning and motivation in transgenic mice

456 figures represent criterion with the sign inverted, thus mapping states of low motivation to  
457 negative criterion values and states of high motivation to positive criterion values.

458 In Figure 1C, trials were pooled across all included sessions and all licks occurring within  
459 1.5 seconds of the stimulus display time (approximately two full stimulus flash cycles) were  
460 included. The cumulative distributions were calculated after grouping trials by animal ID, with  
461 each green line representing one animal's cumulative distribution of licks on go trials. The dark  
462 black line represents lick times pooled over all trials and mice.

463 The max d-prime plotted in Figure 2A represents the peak values calculated from a 100-  
464 trial rolling window without trial count correction and represent the actual values used when  
465 calculating advancement criteria in the automated training algorithm. Median reaction time (RT)  
466 is calculated over the entire duration of the session.

467 Figure 2B represents the training stage for each of the 60 mice in the dataset. White  
468 values are missing data due to animals being removed from the study (for health- and non-  
469 health- related causes) prior to the 15 days displayed in the plot.

470 Figure 2C represents the number of training days to reach stage 2 (light hues) and stage 3  
471 (dark hues) for each genotype. The error bars represent the 95% bootstrapped confidence interval  
472 for all mice that reached stage 3 in each genotype. A main effect of genotype on training time  
473 was identified using the Kruskal-Wallis H-test for independent samples. Pairwise post-hoc  
474 Dunn's multiple comparisons tests were used to identify significant training time differences  
475 between groups.

476 The engagement plots in Figure 3B represent criterion as described in eq. 4, calculated  
477 without trial count correction and with the sign inverted to represent higher states of motivation  
478 in the positive direction. The light gray lines represent criterion values calculated in 10 minute  
479 time bins for each of the sessions performed by that mouse. The black line represents the mean  
480 value across all sessions in each 10 minute bin, with error bars representing standard deviation.

481 In Figure 3C, each light gray line represents the criterion values traversed by a single  
482 mouse in a single session (same as in 3B), with every session from every mouse shown. The  
483 black line represents the average across all sessions. Error bars represent standard deviation.

484 In Figure 3D, every row in the matrix represents one mouse, with each cell representing  
485 the criterion value for that mouse in a given 10 minute epoch, averaged across all expert-level  
486 sessions that the mouse performed. Colors range from dark (low criterion, low motivation) to  
487 light (high criterion, high motivation). Mice are grouped by genotype, and by average criterion  
488 value within genotype.

489 The histogram in Figure 3E shows the range of criterion values assigned to every 10  
490 minute epoch across all 1100 analyzed sessions, regardless of mouse or genotype. Epochs  
491 without at least one hit trial and one false alarm trial (1.2% of the total) were not assigned a  
492 criterion value (and thus not included). The sign of the criterion metric is inverted so that low  
493 motivation states (high criterion values) lie to the left. Thresholds were drawn at criterion values  
494 of 1.25 and -1.25 with every 10 minute epoch being assigned a label of 'motivated' (73.2%),  
495 'under motivated' (18.6%) or 'over motivated' (6.9%) depending on the criterion value in that  
496 epoch.

497 In Figure 3F, each bar represents the average fraction of time spent in a given motivation  
498 state for all animals of a given genotype. Error bars represent bootstrapped 95% confidence  
499 intervals.

500 All data shown in Figure 4 relies on individual trial data separated by the assigned  
501 motivation state, as described in Figure 3E. Trials in expert-level sessions were given a label



## Learning and motivation in transgenic mice

502 (either ‘motivated’, ‘under motivated’ or ‘over motivated’) based on the label of the 10 minute  
503 epoch in which they occurred. Trials that occurred in epochs without a label (i.e., epochs without  
504 at least one hit trial and one false alarm trial) were excluded from the analysis.

505 Figures 4A and 4B include pooled data from mice in all expert sessions. In Figure 4A,  
506 reaction time is calculated as the time to first lick in all hit trials in each of the three motivation  
507 states. In Figure 4B, reward lick count is calculated as the total number of licks in a 5 second  
508 window following reward delivery on every hit trial. Pairwise independent t-tests were used to  
509 assess significance metrics across motivation states.

510 Figures 4C and 4D used performance data calculated for each mouse in each of the three  
511 motivation states, with Figure 4E using data only from the motivated state. In Fig. 4C, hit and  
512 false alarm rates were calculated by pooling across all trials in a given motivation state. Data  
513 points represent mean response probabilities (hit or false alarm rates) from the pooled data. Error  
514 bars representing 95% confidence intervals after a 1000 iteration bootstrap procedure in which N  
515 trials from each motivation state were sampled with replacement, with N set to the lowest trial  
516 count in any of the three motivation states (9382 trials).

517 The d-prime values displayed in Figures 4D and 4E are derived directly from the hit and  
518 false alarm rates shown in Figure 4C, with the value recalculated on the output of every  
519 bootstrap iteration. Error bars representing 95% confidence intervals on the bootstrapped d-prime  
520 values in each state. Statistical comparisons were performed by calculating the total density of  
521 the joint probability distribution on one side of the unity line, yielding a probability,  $p_{boot}$ , that  
522 null hypothesis is true (Saravanan et al., 2019). Pairwise comparisons were deemed significant if  
523 the fraction of overlap was less than the Bonferroni corrected two-tailed alpha. The resolution of  
524  $p_{boot}$  was limited by the number of bootstrap iterations (1000), providing a minimum measurable  
525 value of 0.001.

526 The grand-average response matrix in Figure 5B represents the probability of response  
527 for each image pair, with catch trials (same-to-same transitions) on the diagonal. The matrix was  
528 calculated by first calculating a response matrix for each mouse (using all trials in the motivated  
529 state), then averaging together matrices across all mice in a given genotype, and finally  
530 averaging together matrices across all five genotypes. Thus, mice with different trial numbers  
531 will contribute equally to the genotype averages, and genotypes with different mouse numbers  
532 will contribute equally to the grand-average. Of the 56 mice with at least one expert session, four  
533 mice with fewer than an average of 4 presentations of each of the 64 possible natural image pairs  
534 (256 total trials) were excluded from these and subsequent analyses.

535 Figure 5C represents the data in Figure 5B, but with values from the matrix unwrapped  
536 into vector form, then rank-sorted by response probability. The color value of each dot matches  
537 the color value of the corresponding square in Figure 5B. Gray dots represent each of the five  
538 genotype averaged response probabilities for the corresponding image transition pair.

539 The response probability curves in Figure 5D represent the response probabilities for  
540 each of the 64 image combinations for each of the five genotypes, with the rank order from  
541 Figure 5C preserved. Each gray dot represents the response probability for an individual animal  
542 for a given image pair. The plots in Figure 5E represent the correlation between the genotype-  
543 averaged response vector and the grand-average response vector in Figure 5C, with  $r$  and  $p$ -  
544 values representing Pearson correlation coefficients.

545 Figure 5F shows the Pearson correlation coefficients for each pairwise combination of  
546 genotype response vectors (from Figure 5D). Diagonal terms (with  $p = 1.0$ ) and above diagonal  
547 terms (with values equal to the below diagonal terms) are excluded from the display.



## Learning and motivation in transgenic mice

548           To compare correlation values across the motivational states, we performed a bootstrap  
549 analysis in which we first pooled all trials from a given genotype, then subsampled trials with  
550 replacement from each genotype using the smallest trial count from any genotype/motivation  
551 state combination (708 trials for the Rbp4-Cre mice in the over motivated state). New response  
552 matrices were calculated on the subsampled data and Pearson's correlation coefficients were  
553 calculated for each pair of genotypes. The process was then repeated 1000 times. Correlation  
554 coefficients shown in Figure 5G represent the mean values across all iterations. The range of  
555 correlation values from the bootstrap process were compared in the over motivated vs. motivated  
556 and the under motivated vs. motivated conditions for each pairwise combination of genotypes  
557 using Wilcoxon signed-rank tests.

Learning and motivation in transgenic mice

558 **References**

- 559
- 560 Allen Institute for Brain Science. 2016. Phenotypic Characterization of Transgenic Mouse Lines.  
561 *Allen Inst White Pap* 1–17.
- 562 Allen WE, Chen MZ, Pichamoorthy N, Tien RH, Pachitariu M, Luo L, Deisseroth K. 2019.  
563 Thirst regulates motivated behavior through modulation of brainwide neural population  
564 dynamics. *Science* **393**:0–10. doi:10.1126/science.aav3932
- 565 Andermann ML, Kerlin AM, Reid RC. 2010. Chronic Cellular Imaging of Mouse Visual Cortex  
566 During Operant Behavior and Passive Viewing. *Front Cell Neurosci* **4**:3.  
567 doi:10.3389/fncel.2010.00003
- 568 Batista-Brito R, Vinck M, Ferguson KA, Chang JT, Laubender D, Lur G, Mossner JM,  
569 Hernandez VG, Ramakrishnan C, Deisseroth K, Higley MJ, Cardin JA. 2017.  
570 Developmental Dysfunction of VIP Interneurons Impairs Cortical Circuits. *Neuron* **95**:884-  
571 895.e9. doi:10.1016/j.neuron.2017.07.034
- 572 Berditchevskaia A, Cazé RD, Schultz SR. 2016. Performance in a GO/NOGO perceptual task  
573 reflects a balance between impulsive and instrumental components of behaviour. *Sci Rep*  
574 **6**:27389. doi:10.1038/srep27389
- 575 Brunet NM, Bosman CA, Vinck M, Roberts M, Oostenveld R, Desimone R, De Weerd P, Fries  
576 P. 2014. Stimulus repetition modulates gamma-band synchronization in primate visual  
577 cortex. *Proc Natl Acad Sci U S A* **111**:3626–3631. doi:10.1073/pnas.1309714111
- 578 Burgess CP, Lak A, Steinmetz NA, Zatka-Haas P, Bai Reddy C, Jacobs EAK, Linden JF, Paton  
579 JJ, Ranson A, Schröder S, Soares S, Wells MJ, Wool LE, Harris KD, Carandini M. 2017.  
580 High-Yield Methods for Accurate Two-Alternative Visual Psychophysics in Head-Fixed  
581 Mice. *Cell Rep* **20**:2513–2524. doi:10.1016/j.celrep.2017.08.047
- 582 Calhoun AJ, Pillow JW, Murthy M. 2019. That Shape Natural Behavior. *Nat Neurosci* **22**.  
583 doi:10.1038/s41593-019-0533-x
- 584 Carandini M, Churchland AK. 2013. Probing perceptual decisions in rodents. *Nat Neurosci*  
585 **16**:824–31. doi:10.1038/nn.3410
- 586 Chen JL, Carta S, Soldado-Magraner J, Schneider BL, Helmchen F. 2013. Behaviour-dependent  
587 recruitment of long-range projection neurons in somatosensory cortex. *Nature* **499**:336–40.  
588 doi:10.1038/nature12236
- 589 Daigle TL, Madisen L, Hage TA, Li L, Tasic B, Walker M, Graybuck LT, Yao Z, Fong O,  
590 Nguyen TN, Garren E, Lenz GH, Mcgraw MJ, Ollerenshaw DR, Smith KA, Baker CA,  
591 Ting JT. 2018. Resource A Suite of Transgenic Driver and Reporter Mouse Lines with  
592 Enhanced Brain-Cell-Type Targeting and Resource A Suite of Transgenic Driver and  
593 Reporter Mouse Lines with Enhanced Brain-Cell-Type Targeting and Functionality. *Cell*  
594 465–480. doi:10.1016/j.cell.2018.06.035
- 595 de Vries SEJ, Lecoq J, Buice MA, Groblewski PA, Ocker GK, Oliver M, Feng D, Cain N,  
596 Ledochowitsch P, Millman D, Roll K, Garrett M, Keenan T, Kuan L, Mihalas S, Olsen S,  
597 Thompson C, Wakeman W, Waters J, Williams D, Barber C, Berbesque N, Blanchard B,  
598 Bowles N, Caldejon S, Casal L, Cho A, Cross S, Dang C, Dolbeare T, Edwards M,  
599 Galbraith J, Gaudreault N, Griffin F, Hargrave P, Howard R, Huang L, Jewell S, Keller N,  
600 Knoblich U, Larkin J, Larsen R, Lau C, Lee E, Lee F, Leon A, Li L, Long F, Luviano J,  
601 Mace K, Nguyen T, Perkins J, Robertson M, Seid S, Shea-Brown E, Shi J, Sjoquist N,  
602 Slaughterbeck C, Sullivan D, Valenza R, White C, Williford A, Witten D, Zhuang J, Zeng  
603 H, Farrell C, Ng L, Bernard A, Phillips JW, Reid RC, Koch C. 2019. A large-scale,

Learning and motivation in transgenic mice

- 604 standardized physiological survey reveals higher order coding throughout the mouse visual  
605 cortex. *Nat Neurosci* 359513. doi:10.1101/359513
- 606 Denman DJ, Luviano JA, Ollerenshaw DR, Cross S, Williams D, Buice MA, Olsen SR, Reid  
607 RC. 2018. Mouse color and wavelength-specific luminance contrast sensitivity are non-  
608 uniform across visual space. *Elife* 7:1–16. doi:10.7554/eLife.31209
- 609 Duffy E. 1957. The psychological significance of the concept of “arousal” or “activation.”  
610 *Psychol Rev* 64:265–275. doi:10.1037/h0048837
- 611 Elmore LC, Ji Ma W, Magnotti JF, Leising KJ, Passaro AD, Katz JS, Wright AA. 2011. Visual  
612 short-term memory compared in rhesus monkeys and humans. *Curr Biol* 21:975–979.  
613 doi:10.1016/j.cub.2011.04.031
- 614 Garrett ME, Manavi S, Roll K, Ollerenshaw DR, Groblewski PA, Kiggins J, Jia X, Casal L,  
615 Mace K, Williford A, Leon A, Mihalas S, Olsen SR. 2020. Experience shapes activity  
616 dynamics and stimulus coding of VIP inhibitory and excitatory cells in visual cortex. *Elife*.
- 617 Glickfeld LL, Histed MH, Maunsell JHR. 2013. Mouse primary visual cortex is used to detect  
618 both orientation and contrast changes. *J Neurosci* 33:19416–22.  
619 doi:10.1523/JNEUROSCI.3560-13.2013
- 620 Goard MJ, Pho GN, Woodson J, Sur M. 2016. Distinct roles of visual, parietal, and frontal motor  
621 cortices in memory-guided sensorimotor decisions. *Elife* 5:e13764.
- 622 Green DM, Swets JA, others. 1966. Signal detection theory and psychophysics. Wiley New  
623 York.
- 624 Guo Z V., Hires SA, Li N, O’Connor DH, Komiyama T, Ophir E, Huber D, Bonardi C,  
625 Morandell K, Gutnisky D, Peron S, Xu NL, Cox J, Svoboda K. 2014. Procedures for  
626 Behavioral Experiments in Head-Fixed Mice. *PLoS One* 9:e88678.  
627 doi:10.1371/journal.pone.0088678
- 628 Guo Z, Li N, Huber D, Ophir E, Gutnisky D, Ting J, Feng G, Svoboda K. 2014. Flow of cortical  
629 activity underlying a tactile decision in mice. *Neuron* 81:179–194.  
630 doi:10.1016/j.neuron.2013.10.020
- 631 Hagmann CE, Cook RG. 2013. Active change detection by pigeons and humans. *J Exp Psychol*  
632 *Anim Behav Process* 39:383–389. doi:10.1037/a0033313
- 633 Harvey CD, Coen P, Tank DW. 2012. Choice-specific sequences in parietal cortex during a  
634 virtual-navigation decision task. *Nature* 484:62–8. doi:10.1038/nature10918
- 635 Histed MH, Carvalho LA, Maunsell JHR. 2012. Psychophysical measurement of contrast  
636 sensitivity in the behaving mouse. *J Neurophysiol* 107:758–65. doi:10.1152/jn.00609.2011
- 637 Huber D, Gutnisky D a, Peron S, O’Connor DH, Wiegert JS, Tian L, Oertner TG, Looger LL,  
638 Svoboda K. 2012. Multiple dynamic representations in the motor cortex during  
639 sensorimotor learning. *Nature* 484:473–8. doi:10.1038/nature11039
- 640 Koch C, Reid RC. 2012. Neuroscience: Observatories of the mind. *Nature* 483:397.
- 641 Li N, Daie K, Svoboda K, Druckmann S. 2016. Robust neuronal dynamics in premotor cortex  
642 during motor planning. *Nature* 532:459–64. doi:10.1038/nature17643
- 643 Luo L, Callaway EM, Svoboda K. 2018. Genetic Dissection of Neural Circuits: A Decade of  
644 Progress. *Neuron* 98:256–281. doi:10.1016/j.neuron.2018.03.040
- 645 Luo L, Callaway EM, Svoboda K. 2008. Genetic Dissection of Neural Circuits. *Neuron* 57:634–  
646 660. doi:10.1016/j.neuron.2008.01.002
- 647 Madisen L, Garner AR, Shimaoka D, Chuong AS, Klapoetke NC, Li L, van der Bourg A, Niino  
648 Y, Egolf L, Monetti C, Gu H, Mills M, Cheng A, Tasic B, Nguyen TN, Sunkin SM,  
649 Benucci A, Nagy A, Miyawaki A, Helmchen F, Empson RM, Knöpfel T, Boyden ES, Reid

## Learning and motivation in transgenic mice

- 650 RC, Carandini M, Zeng H. 2015. Transgenic mice for intersectional targeting of neural  
651 sensors and effectors with high specificity and performance. *Neuron* **85**:942–958.  
652 doi:10.1016/j.neuron.2015.02.022
- 653 Mcginley MJ, David S V, McCormick DA. 2015. Cortical Membrane Potential Signature of  
654 Optimal States for Sensory Signal Detection. *Neuron* **87**:179–192.  
655 doi:10.1016/j.neuron.2015.05.038
- 656 McGinley MJ, Vinck M, Reimer J, Batista-Brito R, Zagha E, Cadwell CR, Tolias AS, Cardin JA,  
657 McCormick DA. 2015. Waking state: rapid variations modulate neural and behavioral  
658 responses. *Neuron* **87**:1143–1161. doi:10.1016/j.neuron.2015.09.012
- 659 Musall S, Kaufman MT, Juavinett AL, Gluf S, Churchland AK. 2019. Single-trial neural  
660 dynamics are dominated by richly varied movements. *Nat Neurosci* **22**.  
661 doi:10.1038/s41593-019-0502-4
- 662 Niell CM. 2015. Cell Types, Circuits, and Receptive Fields in the Mouse Visual Cortex. *Annu*  
663 *Rev Neurosci* **38**:413–431. doi:10.1146/annurev-neuro-071714-033807
- 664 O'Connor DH, Clack NG, Huber D, Komiyama T, Myers EW, Svoboda K. 2010. Vibrissa-Based  
665 Object Localization in Head-Fixed Mice. *J Neurosci* **30**:1947–1967.  
666 doi:10.1523/JNEUROSCI.3762-09.2010
- 667 O'Connor DH, Hires SA, Guo Z V., Li N, Yu J, Sun Q-Q, Huber D, Svoboda K. 2013. Neural  
668 coding during active somatosensation revealed using illusory touch. *Nat Neurosci* **16**:958–  
669 965. doi:10.1038/nn.3419
- 670 Pearson JM, Platt ML. 2013. Change detection, multiple controllers, and dynamic environments:  
671 Insights from the brain. *J Exp Anal Behav* **99**:74–84. doi:10.1002/jeab.5
- 672 Peron SP, Freeman J, Guo C, Svoboda K, Peron SP, Freeman J, Iyer V, Guo C, Svoboda K.  
673 2015. A Cellular Resolution Map of Barrel Cortex Activity during Tactile Behavior. *Neuron*  
674 **86**:783–799. doi:10.1016/j.neuron.2015.03.027
- 675 Petreanu L, Gutnisky D a, Huber D, Xu N, O'Connor DH, Tian L, Looger L, Svoboda K. 2012.  
676 Activity in motor-sensory projections reveals distributed coding in somatosensation. *Nature*  
677 **489**:299–303. doi:10.1038/nature11321
- 678 Pinto L, Goard MJ, Estandian D, Xu M, Kwan AC, Lee S-H, Harrison TC, Feng G, Dan Y.  
679 2013. Fast modulation of visual perception by basal forebrain cholinergic neurons. *Nat*  
680 *Neurosci* **16**:1857–63. doi:10.1038/nn.3552
- 681 Poort J, Khan AG, Pachitariu M, Nemri A, Orsolich I, Krupic J, Bauza M, Sahani M, Keller GB,  
682 Mrsic-Flogel TD, Hofer SB. 2015. Learning Enhances Sensory and Multiple Non-sensory  
683 Representations in Primary Visual Cortex. *Neuron* **86**:1478–1490.  
684 doi:10.1016/j.neuron.2015.05.037
- 685 Rensink RA. 2002. Change Detection\_2002.pdf. *Annu Rev Psychol*.
- 686 Resulaj A, Ruediger S, Olsen SR, Scanziani M. 2018. First spikes in visual cortex enable  
687 perceptual discrimination. *Elife* **7**:1–22. doi:10.7554/eLife.34044
- 688 Saravanan V, Berman GJ, Sober SJ. 2019. Application of the hierarchical bootstrap to multi-  
689 level data in neuroscience. *bioRxiv* 819334. doi:10.1101/819334
- 690 Stringer C, Pachitariu M, Steinmetz N, Reddy CB, Carandini M, Harris KD. 2019. Spontaneous  
691 behaviors drive multidimensional, brainwide activity. *Science (80- )* **364**.  
692 doi:10.1126/science.aav7893
- 693 Wiltschko AB, Johnson MJ, Iurilli G, Peterson RE, Katon JM, Pashkovski SL, Abraira VE,  
694 Adams RP, Datta SR. 2015. Mapping Sub-Second Structure in Mouse Behavior. *Neuron*  
695 **88**:1121–1135. doi:10.1016/j.neuron.2015.11.031

## Learning and motivation in transgenic mice

- 696 Womelsdorf T, Fries P, Mitra PP, Desimone R. 2006. Gamma-band synchronization in visual  
697 cortex predicts speed of change detection. *Nature* **439**:733–736. doi:10.1038/nature04258  
698 Yerkes RM, Dodson JD. 1908. THE RELATION OF STRENGTH OF STIMULUS TO  
699 RAPIDITY OF HABIT-FORMATION. *J Comp Neurol Psychol* **18**:459–482.  
700 Yu Y, Hira R, Stirman JN, Yu W, Smith IT, Smith SL. 2018. Mice use robust and common  
701 strategies to discriminate natural scenes. *Sci Rep* **8**:1379. doi:10.1038/s41598-017-19108-w  
702

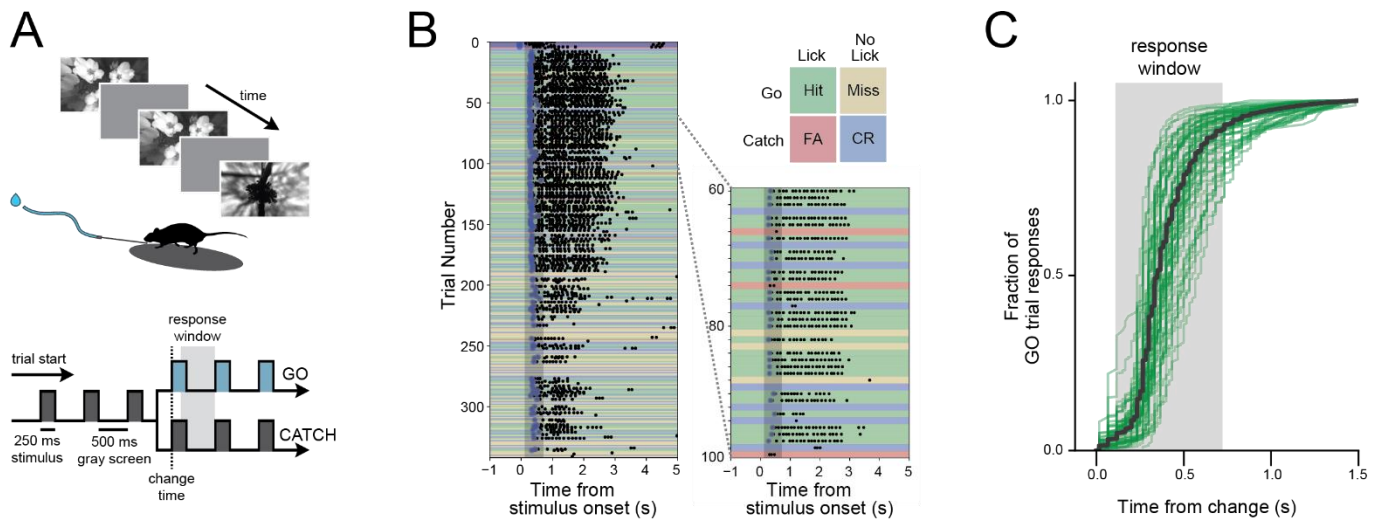

### Figure 1. Change detection task with natural images.

A) Behavioral task. Visual stimuli are shown for 250 ms with an intervening gray period of 500 ms. On GO trials, the image identity changes and mice must lick within the 600 ms response window to receive a water reward. On CATCH trials, no image change occurs, and licking is measured to quantify guessing behavior.

B) Example of a complete behavior session with trials aligned to the time of image change. Trial types and outcomes are illustrated in the 2x2 matrix.

C) Cumulative reaction time distribution on GO trials. Green lines show individual mice (n=56), and the black line indicates the average of all mice.



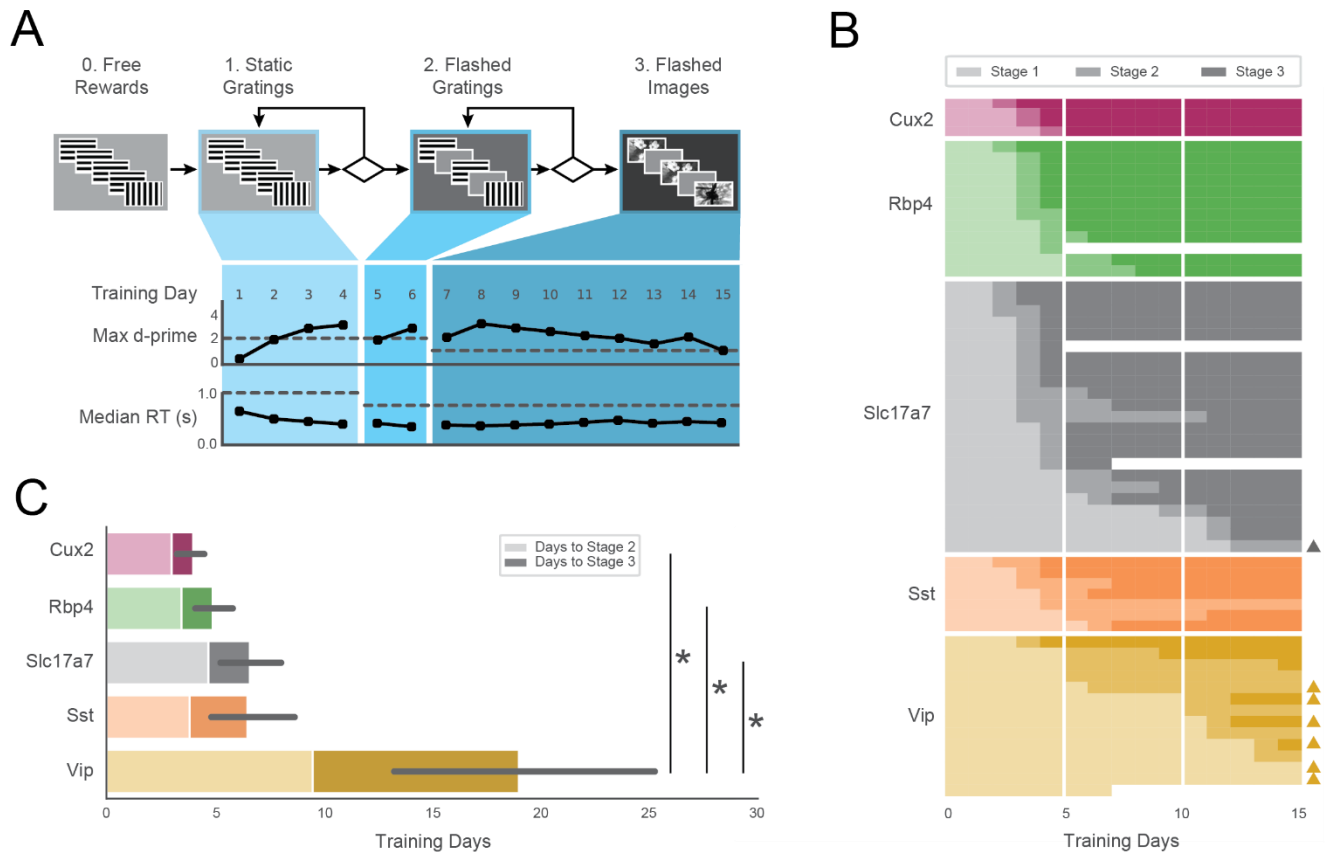

**Figure 2. Automated training of five GCaMP6-expressing transgenic lines.**

A) *Top*: Progression of training stages. *Bottom*: Training trajectory for one example mouse (M328341, genotype: Rbp4). Max d-prime (in 100-trial rolling window) and median reaction time are shown for each training day. Horizontal dashed lines represent the max d-prime required for advancement and the maximum reaction time following stimulus change which would result in reward.

B) Training days in each stage (each row is one mouse). Opacity of bar indicates training stages 1-3 in (A). Triangles on right indicate mice that reached Stage 3 after 3 weeks of training. Some mice (n=4) were removed from training early due to a health-related issue.

C) Average number of sessions required to reach Stage 2 (light shading) and Stage 3 (dark shading) for all groups. Non-parametric analysis showed a significant main effect of group on time to Stage 3, with Vip mice exhibiting significantly longer training times than Slc17a7, Rbp4, and Cux2 mice.

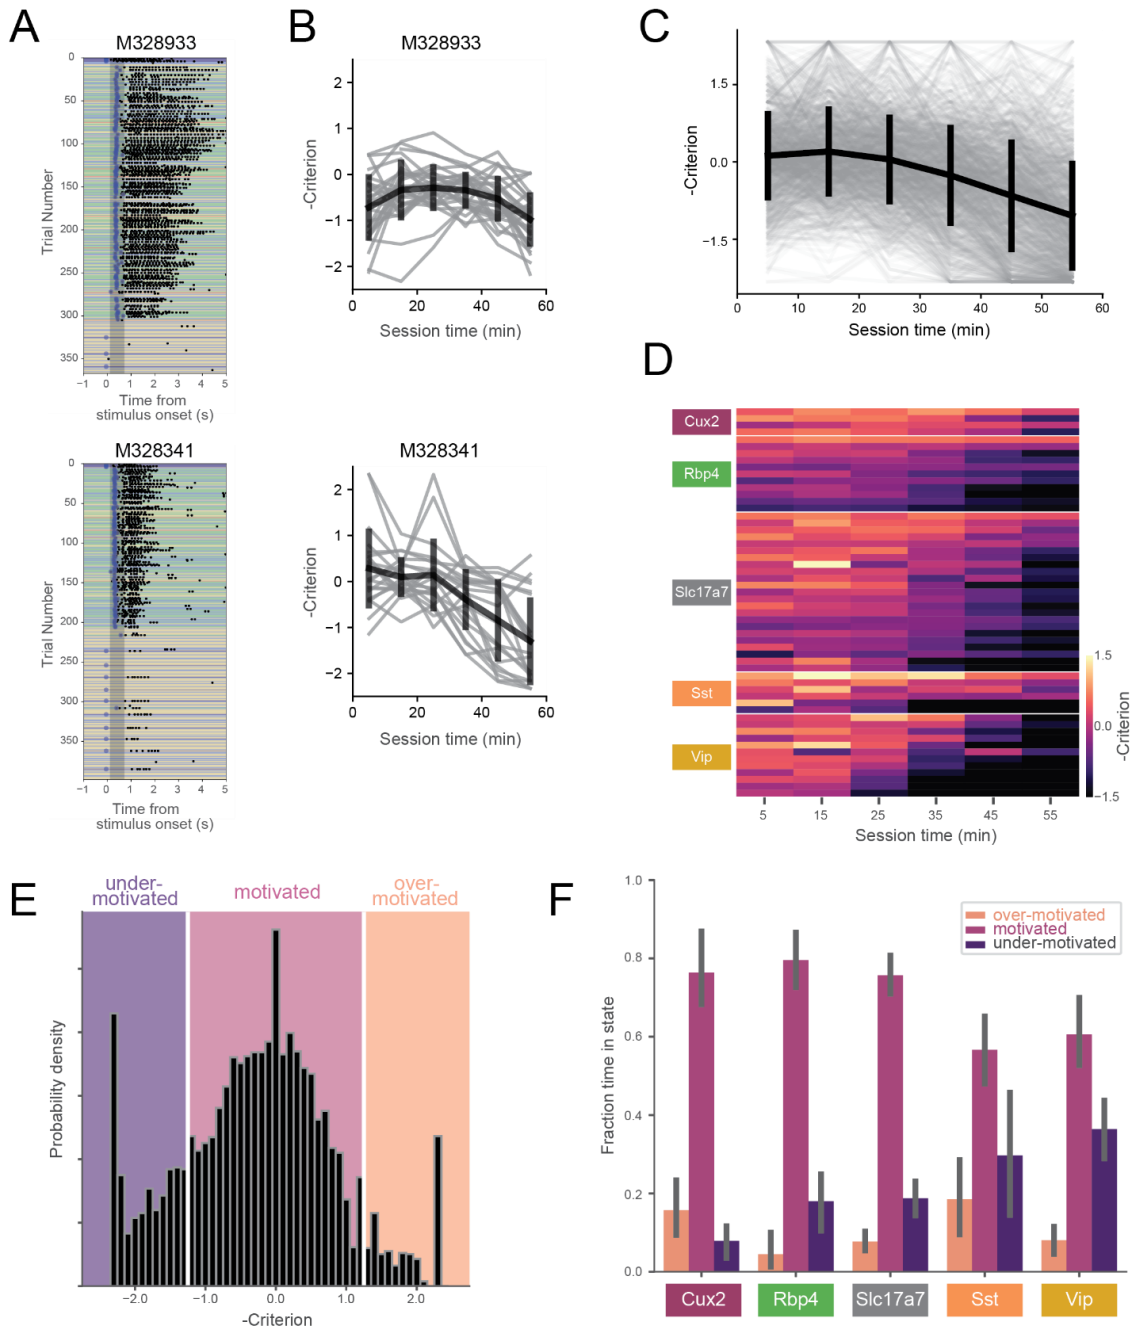

**Figure 3. Motivation decreases over behavioral session.**

A) Example behavioral sessions from two mice showing high task-engagement early in the session followed by later disengagement.

B) Criterion  $(-0.5 \cdot (z(\text{HR}) + z(\text{FA})))$  computed in 10-minute bins for same mice in (A). Individual sessions are shown in gray and the mean over all sessions ( $\pm$ SD) is shown in black.

C) Criterion in 10-minute bins for all sessions (gray) and mean ( $\pm$ SD) across all mice (black).

D) Across-session average of criterion values for all mice (each row represents a single mouse).

E) Histogram of criterion values (10-minute epochs). White lines indicate boundaries for defining 3 motivation states: ‘over-motivated’ (criterion  $> 1.25$ ), ‘motivated’ ( $-1.25 \leq \text{criterion} \leq 1.25$ ), and ‘under-motivated’ (criterion  $< -1.25$ ).

F) Fraction of session epochs spent in each engagement state. All groups except Sst and Vip groups spent significantly more time in motivated versus under-motivated states.

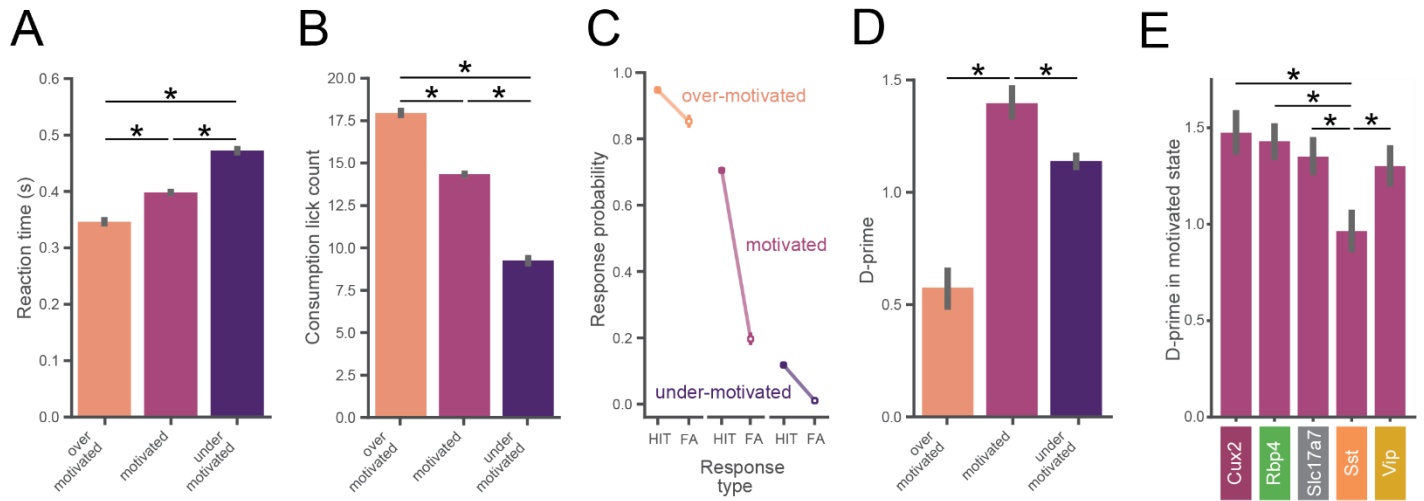

**Figure 4. Task performance varies across motivation states.**

- A) Reaction times are slower with lower motivation. In panels A-D, data is pooled across all mice (n=56) and motivation state is defined as in Figure 3E.
- B) Total number of water consumption licks is less with lower motivation. Total licks are counted in a 5 second window following reward.
- C) Hit and false alarm rates in each motivation state (defined as in Fig 3E).
- D) Inverted-U relationship between d-prime and motivational level. D-prime is higher in motivated compared to over- and under-motivated states.
- E) D-prime in the motivated state for each genotype. The Sst group exhibited a lower d-prime than each of the other genotypes in the motivated state.

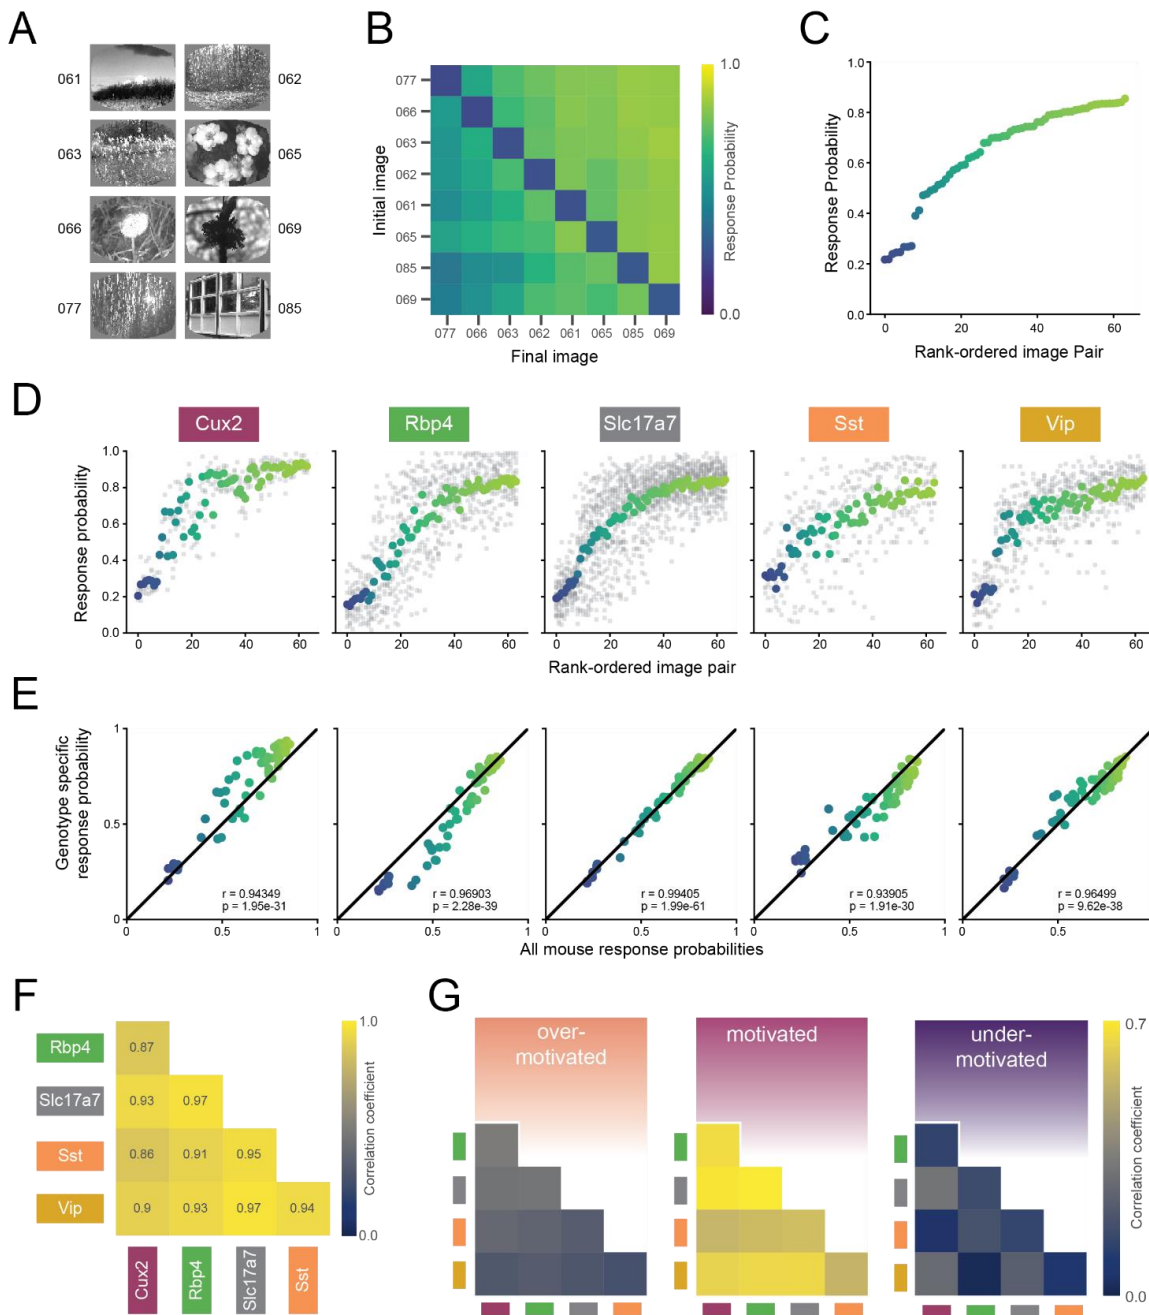

**Figure 5. Similar perception across mice during motivated epochs.**

A) Eight natural scene images used during Stage 3 of change detection task (see Figure 2A). Number indicates label from DeVries et al., 2020.

B) Response rate for all pairwise image transitions in the motivated state (average of all mice).

C) Average response rate for each image-pair transition. X-axis is ordered by average response rate across all 64 transitions.

D) Mean response rate for each image-pair, separated by genotype. The color for each image pair is conserved from (C). Gray points show response rate for each transition for each mouse.

E) In the motivated state, each genotype's pattern of responding was strongly correlated with the average over all mice.

F) Response patterns in the motivated state are strongly correlated between all genotypes.

G) Bootstrapped correlations of response patterns across genotypes are higher in the motivated compared to under- and over-motivated states. Absolute values are lower compared to (F) due to subsampling to match small trial counts in over-motivated state.

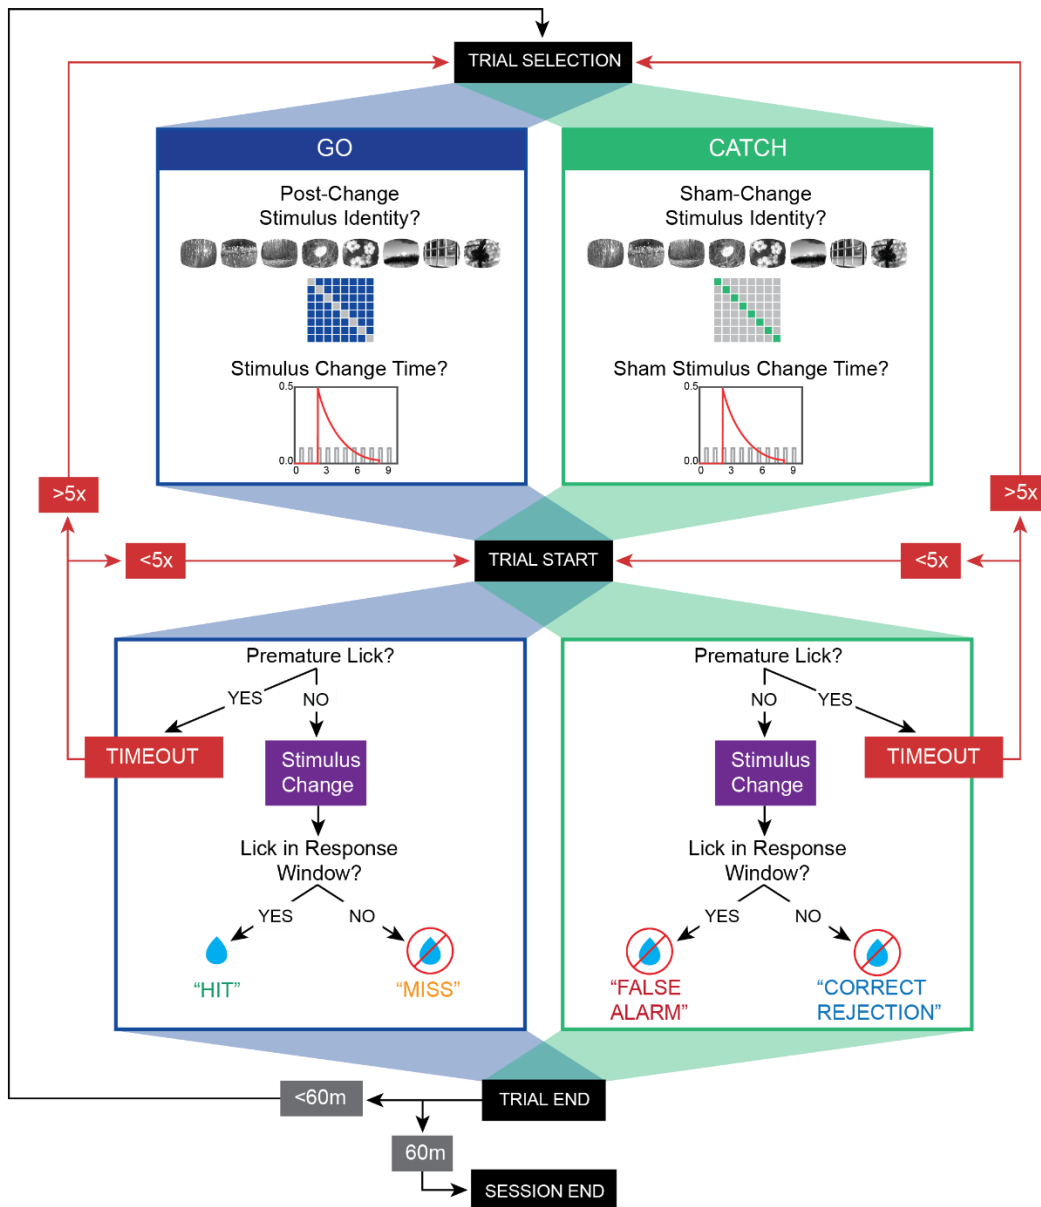

### Supplemental Figure 1. Task flow diagram.

The “Flashed Images” stage of the change detection task consists of 8 images, resulting in 64 possible image transitions, including both GO and CATCH trials. GO trials comprise 87.5% of all trials and are represented in the off-diagonal portions of the 8x8 change matrix. CATCH trials comprise 12.5% of all trials and are represented in the diagonal of the matrix. Each trial was first selected as either GO or CATCH and a post-change (or sham-change) image identity was chosen from the change matrix. The stimulus change (or sham-change) time was then selected from a truncated exponential distribution between 2.25s to 8.25s. As stimuli are presented every 715 ms, the actual change time was determined as the nearest flash from the drawn time. Once a trial started, a premature lick (i.e., a lick that occurred prior to the predetermined change time) resulted in a timeout and the trial was restarted. If an animal caused a trial to timeout 5 times, a new trial was selected. If no premature licks were recorded, the trial progressed and the stimulus change occurred at the predetermined change-time. On GO trials, a lick detected within 600ms response window resulted in a “HIT” (and subsequent reward delivered) whereas a lack of response resulted in a “MISS”. On CATCH trials, a lick within the window following the sham-change resulted in a “FALSE ALARM”, whereas a lack of response resulted in a “CORRECT REJECTION”. Following the stimulus change and response window the trial ended and a new trial was selected. The session ended after 60 minutes.

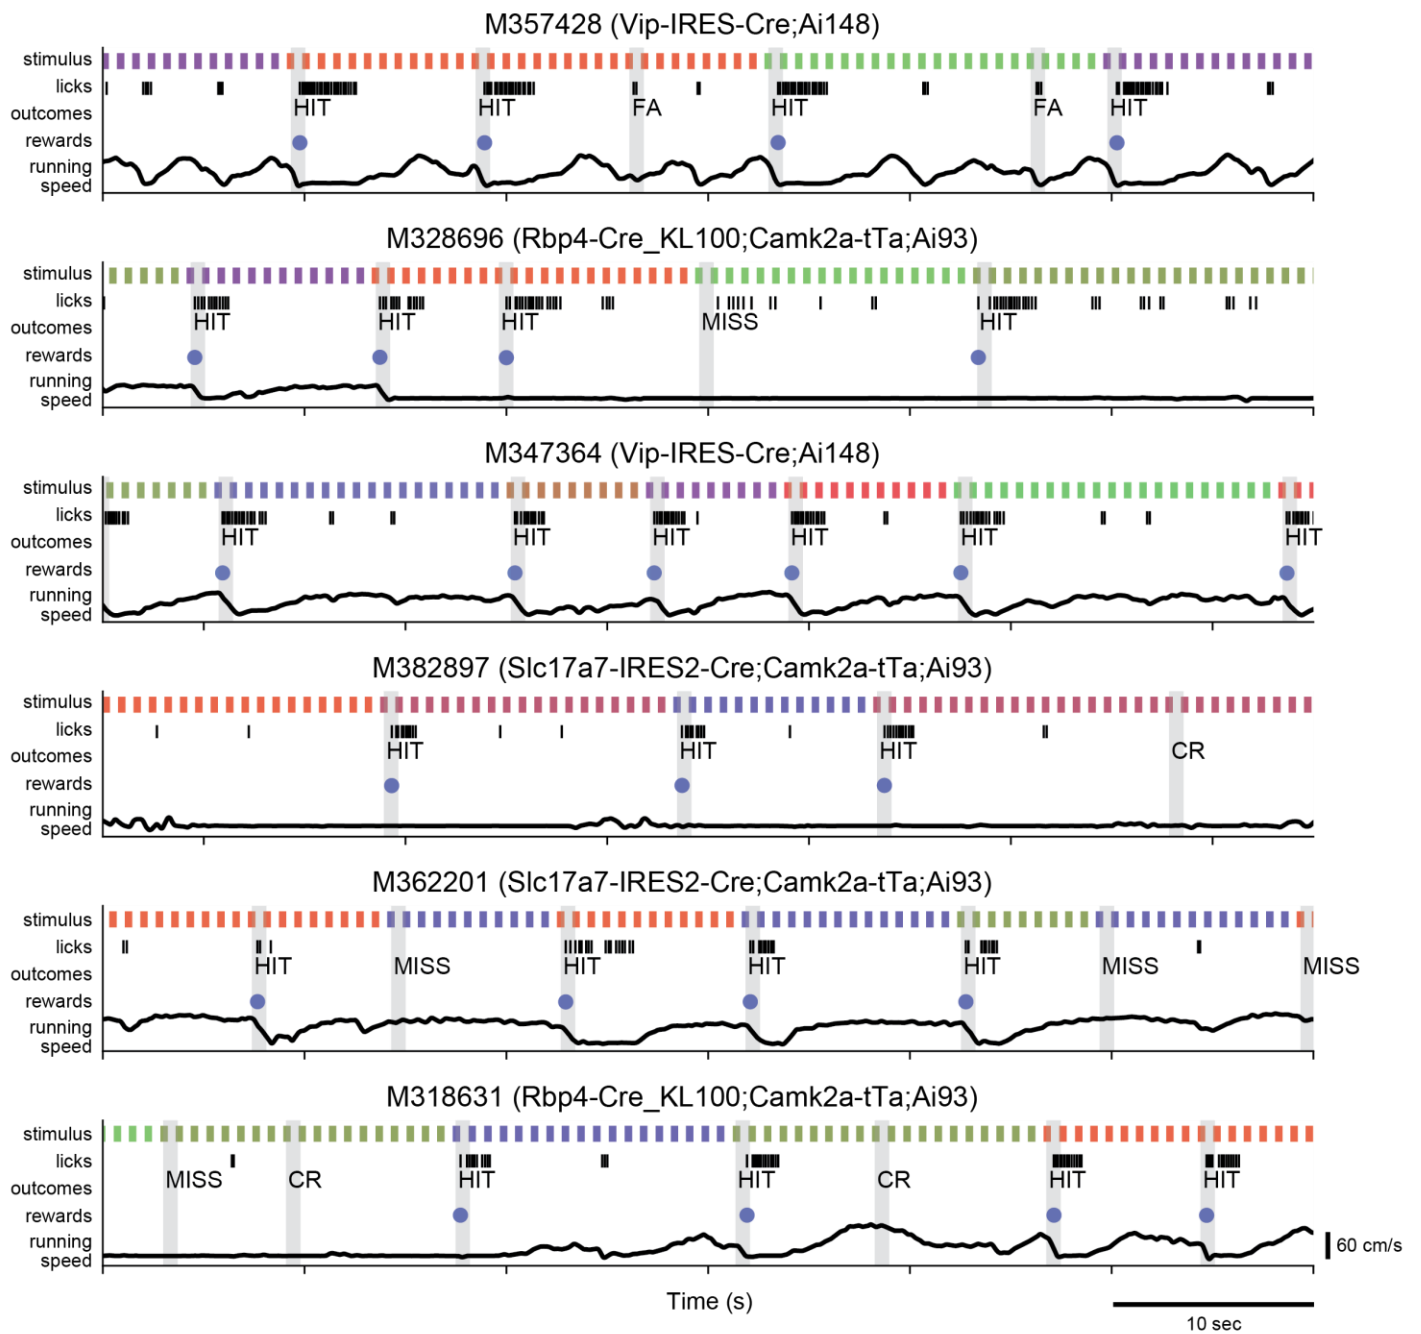

### Supplemental Figure 2. Example behavioral segments.

One-minute examples of behavior from 6 mice of various genotypes. Each example shows stimulus (color-coded by image identity to show when changes occur), licks, trial outcome, reward delivery, and running speed.



A

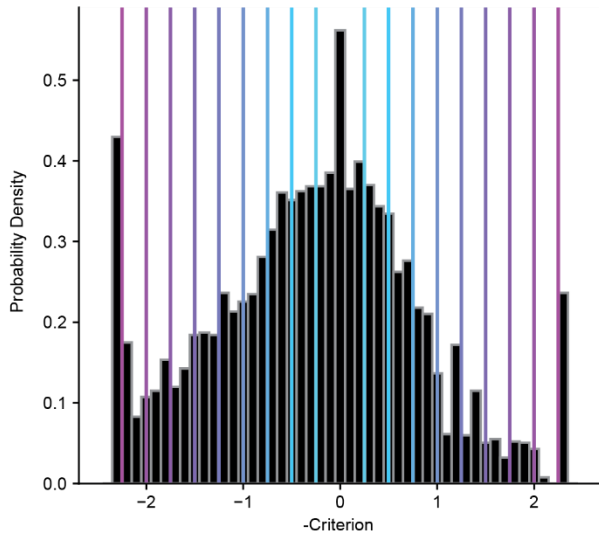

B

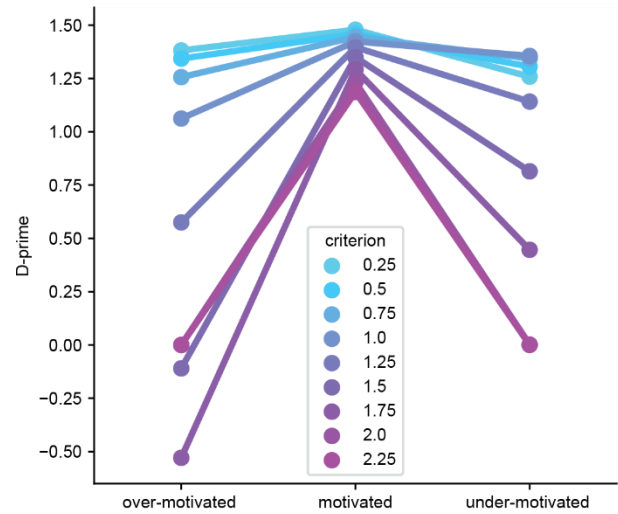

**Supplemental Figure 3. D-prime in each motivation state for a range of criterion thresholds.**

A) The histogram of criterion values (same as Fig 3E) with a range of criterion thresholds drawn. Thresholds range from +/- 0.5 to +/- 2.25 in increments of 0.25. In every case, the 'motivated' epochs are designated as those that fall between the thresholds, the over motivated epochs are those that fall to the right of the higher threshold and the under motivated epochs are those that fall to the left of the lower threshold. Note that thresholds of +/- 1.25 were used in the main figures.

B) D-prime calculated on all pooled trials in each of the three motivation states for the range of criterion values shown in A.

| Mouse   | Driver Line       | Reporter Line              | Sex | Age (days) at start of training | Days in stage 1 | Days in stage 2 | Days in stage 3 | Analyzed stage 3 sessions | Number of motivated trials | Number of under-motivated trials | Number of over-motivated trials | Number of uncategorized trials |
|---------|-------------------|----------------------------|-----|---------------------------------|-----------------|-----------------|-----------------|---------------------------|----------------------------|----------------------------------|---------------------------------|--------------------------------|
| M373115 | Cux2-CreERT2      | Ai93(TITL-GCaMP6f)         | M   | 79                              | 4               | 1               | 29              | 24                        | 2601                       | 732                              | 669                             | 95                             |
| M373118 | Cux2-CreERT2      | Ai93(TITL-GCaMP6f)         | M   | 118                             | 3               | 1               | 37              | 36                        | 8884                       | 80                               | 782                             | 6                              |
| M374446 | Cux2-CreERT2      | Ai93(TITL-GCaMP6f)         | M   | 111                             | 2               | 1               | 38              | 37                        | 7310                       | 1217                             | 912                             | 15                             |
| M389532 | Cux2-CreERT2      | Ai93(TITL-GCaMP6f)         | M   | 95                              | 3               | 1               | 37              | 37                        | 6298                       | 1632                             | 742                             | 47                             |
| M318631 | Rbp4-Cre_KL100    | Ai93(TITL-GCaMP6f)         | M   | 102                             | 5               | 3               | 10              | 9                         | 2324                       | 612                              | 0                               | 0                              |
| M318635 | Rbp4-Cre_KL100    | Ai93(TITL-GCaMP6f)         | F   | 102                             | 3               | 1               | 16              | 13                        | 3293                       | 675                              | 0                               | 0                              |
| M328341 | Rbp4-Cre_KL100    | Ai93(TITL-GCaMP6f)         | M   | 77                              | 4               | 2               | 24              | 21                        | 3994                       | 1730                             | 27                              | 0                              |
| M328344 | Rbp4-Cre_KL100    | Ai93(TITL-GCaMP6f)         | F   | 77                              | 2               | 1               | 38              | 34                        | 7586                       | 5941                             | 0                               | 0                              |
| M328696 | Rbp4-Cre_KL100    | Ai93(TITL-GCaMP6f)         | M   | 76                              | 3               | 1               | 37              | 36                        | 9960                       | 171                              | 42                              | 3                              |
| M328933 | Rbp4-Cre_KL100    | Ai93(TITL-GCaMP6f)         | F   | 75                              | 3               | 1               | 37              | 28                        | 6864                       | 1601                             | 0                               | 1                              |
| M330194 | Rbp4-Cre_KL100    | Ai93(TITL-GCaMP6f)         | M   | 84                              | 3               | 1               | 37              | 24                        | 5572                       | 589                              | 0                               | 0                              |
| M330196 | Rbp4-Cre_KL100    | Ai93(TITL-GCaMP6f)         | F   | 84                              | 3               | 2               | 36              | 35                        | 8376                       | 4498                             | 0                               | 0                              |
| M348627 | Rbp4-Cre_KL100    | Ai93(TITL-GCaMP6f)         | F   | 81                              | 5               | 2               | 27              | 21                        | 3632                       | 2510                             | 0                               | 20                             |
| M370023 | Rbp4-Cre_KL100    | Ai93(TITL-GCaMP6f)         | M   | 135                             | 4               | 1               | 26              | 24                        | 3183                       | 26                               | 505                             | 77                             |
| M376756 | Rbp4-Cre_KL100    | Ai93(TITL-GCaMP6f)         | F   | 100                             | 3               | 1               | 25              | 16                        | 2523                       | 2098                             | 0                               | 23                             |
| M376801 | Rbp4-Cre_KL100    | Ai93(TITL-GCaMP6f)         | F   | 134                             | 4               | 1               | 0               | 0                         | 0                          | 0                                | 0                               | 0                              |
| M324022 | Slc17a7-IRES2-Cre | Ai93(TITL-GCaMP6f)         | M   | 81                              | 9               | 2               | 29              | 21                        | 3824                       | 1365                             | 75                              | 0                              |
| M324023 | Slc17a7-IRES2-Cre | Ai93(TITL-GCaMP6f)         | M   | 81                              | 12              | 4               | 25              | 12                        | 2662                       | 978                              | 0                               | 0                              |
| M324030 | Slc17a7-IRES2-Cre | Ai93(TITL-GCaMP6f)         | F   | 81                              | 5               | 4               | 11              | 11                        | 2011                       | 1463                             | 0                               | 0                              |
| M333706 | Slc17a7-IRES2-Cre | Ai93(TITL-GCaMP6f)         | F   | 69                              | 2               | 1               | 38              | 33                        | 6088                       | 2138                             | 268                             | 4                              |
| M334310 | Slc17a7-IRES2-Cre | Ai93(TITL-GCaMP6f)         | F   | 66                              | 4               | 1               | 35              | 35                        | 8545                       | 1582                             | 120                             | 0                              |
| M336340 | Slc17a7-IRES2-Cre | Ai93(TITL-GCaMP6f)         | M   | 58                              | 6               | 1               | 34              | 34                        | 8835                       | 2072                             | 0                               | 0                              |
| M336349 | Slc17a7-IRES2-Cre | Ai93(TITL-GCaMP6f)         | F   | 58                              | 11              | 1               | 29              | 24                        | 4812                       | 1098                             | 134                             | 7                              |
| M347745 | Slc17a7-IRES2-Cre | Ai93(TITL-GCaMP6f)         | M   | 86                              | 4               | 1               | 36              | 34                        | 7980                       | 577                              | 338                             | 0                              |
| M355469 | Slc17a7-IRES2-Cre | Ai93(TITL-GCaMP6f)         | M   | 72                              | 11              | 1               | 29              | 28                        | 5658                       | 3696                             | 115                             | 0                              |
| M354477 | Slc17a7-IRES2-Cre | Ai93(TITL-GCaMP6f)         | F   | 98                              | 3               | 4               | 34              | 30                        | 5632                       | 1947                             | 86                              | 0                              |
| M355471 | Slc17a7-IRES2-Cre | Ai93(TITL-GCaMP6f)         | M   | 94                              | 4               | 1               | 25              | 25                        | 5083                       | 2027                             | 256                             | 30                             |
| M362197 | Slc17a7-IRES2-Cre | Ai93(TITL-GCaMP6f)         | M   | 91                              | 3               | 1               | 24              | 22                        | 3406                       | 412                              | 428                             | 42                             |
| M362201 | Slc17a7-IRES2-Cre | Ai93(TITL-GCaMP6f)         | M   | 92                              | 3               | 1               | 19              | 19                        | 3243                       | 120                              | 744                             | 38                             |
| M363140 | Slc17a7-IRES2-Cre | Ai93(TITL-GCaMP6f)         | M   | 102                             | 3               | 8               | 30              | 26                        | 6195                       | 1425                             | 150                             | 12                             |
| M369320 | Slc17a7-IRES2-Cre | Ai93(TITL-GCaMP6f)         | M   | 87                              | 2               | 2               | 33              | 32                        | 3971                       | 4303                             | 791                             | 8                              |
| M369315 | Slc17a7-IRES2-Cre | Ai93(TITL-GCaMP6f)         | F   | 88                              | 5               | 2               | 10              | 7                         | 899                        | 393                              | 67                              | 0                              |
| M369578 | Slc17a7-IRES2-Cre | Ai93(TITL-GCaMP6f)         | F   | 86                              | 2               | 1               | 14              | 14                        | 2284                       | 1780                             | 61                              | 28                             |
| M382895 | Slc17a7-IRES2-Cre | Ai93(TITL-GCaMP6f)         | F   | 98                              | 3               | 1               | 1               | 1                         | 278                        | 0                                | 0                               | 0                              |
| M382897 | Slc17a7-IRES2-Cre | Ai93(TITL-GCaMP6f)         | F   | 98                              | 3               | 3               | 35              | 35                        | 6144                       | 970                              | 840                             | 7                              |
| M385255 | Slc17a7-IRES2-Cre | Ai93(TITL-GCaMP6f)         | M   | 86                              | 3               | 1               | 15              | 14                        | 2167                       | 757                              | 217                             | 31                             |
| M384942 | Slc17a7-IRES2-Cre | Ai93(TITL-GCaMP6f)         | F   | 95                              | 3               | 1               | 14              | 14                        | 1740                       | 2262                             | 98                              | 7                              |
| M387109 | Slc17a7-IRES2-Cre | Ai93(TITL-GCaMP6f)         | F   | 89                              | 3               | 1               | 34              | 28                        | 6883                       | 1188                             | 29                              | 0                              |
| M390905 | Slc17a7-IRES2-Cre | Ai93(TITL-GCaMP6f)         | M   | 88                              | 4               | 1               | 2               | 2                         | 162                        | 199                              | 46                              | 20                             |
| M358210 | Sst-IRES-Cre      | Ai148(TIT2L-GC6f-ICL-tTA2) | M   | 79                              | 6               | 1               | 34              | 21                        | 1849                       | 1118                             | 200                             | 130                            |
| M358211 | Sst-IRES-Cre      | Ai148(TIT2L-GC6f-ICL-tTA2) | M   | 113                             | 3               | 4               | 22              | 11                        | 1017                       | 0                                | 187                             | 41                             |
| M360543 | Sst-IRES-Cre      | Ai148(TIT2L-GC6f-ICL-tTA2) | M   | 100                             | 4               | 25              | 0               | 0                         | 0                          | 0                                | 0                               | 0                              |
| M358213 | Sst-IRES-Cre      | Ai148(TIT2L-GC6f-ICL-tTA2) | M   | 114                             | 2               | 2               | 15              | 5                         | 506                        | 186                              | 38                              | 42                             |
| M358809 | Sst-IRES-Cre      | Ai148(TIT2L-GC6f-ICL-tTA2) | M   | 110                             | 5               | 6               | 6               | 4                         | 588                        | 655                              | 0                               | 0                              |
| M366616 | Sst-IRES-Cre      | Ai148(TIT2L-GC6f-ICL-tTA2) | M   | 102                             | 3               | 1               | 12              | 2                         | 171                        | 419                              | 0                               | 0                              |
| M389575 | Sst-IRES-Cre      | Ai148(TIT2L-GC6f-ICL-tTA2) | M   | 81                              | 4               | 2               | 30              | 9                         | 1214                       | 379                              | 54                              | 5                              |
| M327444 | Vip-IRES-Cre      | Ai148(TIT2L-GC6f-ICL-tTA2) | F   | 81                              | 5               | 9               | 27              | 1                         | 144                        | 0                                | 0                               | 0                              |
| M330982 | Vip-IRES-Cre      | Ai148(TIT2L-GC6f-ICL-tTA2) | M   | 67                              | 13              | 26              | 2               | 2                         | 241                        | 535                              | 0                               | 0                              |
| M329069 | Vip-IRES-Cre      | Ai148(TIT2L-GC6f-ICL-tTA2) | F   | 88                              | 22              | 16              | 3               | 3                         | 478                        | 583                              | 0                               | 0                              |
| M329071 | Vip-IRES-Cre      | Ai148(TIT2L-GC6f-ICL-tTA2) | F   | 88                              | 13              | 1               | 27              | 24                        | 3321                       | 3532                             | 56                              | 0                              |
| M333115 | Vip-IRES-Cre      | Ai148(TIT2L-GC6f-ICL-tTA2) | F   | 72                              | 32              | 7               | 0               | 0                         | 0                          | 0                                | 0                               | 0                              |
| M333117 | Vip-IRES-Cre      | Ai148(TIT2L-GC6f-ICL-tTA2) | F   | 72                              | 10              | 2               | 4               | 2                         | 134                        | 128                              | 19                              | 14                             |
| M336247 | Vip-IRES-Cre      | Ai148(TIT2L-GC6f-ICL-tTA2) | F   | 58                              | 7               | 0               | 0               | 0                         | 0                          | 0                                | 0                               | 0                              |
| M347364 | Vip-IRES-Cre      | Ai148(TIT2L-GC6f-ICL-tTA2) | M   | 104                             | 5               | 4               | 31              | 28                        | 3819                       | 4904                             | 147                             | 2                              |
| M357428 | Vip-IRES-Cre      | Ai148(TIT2L-GC6f-ICL-tTA2) | M   | 83                              | 10              | 14              | 17              | 15                        | 1913                       | 3182                             | 128                             | 0                              |
| M363894 | Vip-IRES-Cre      | Ai148(TIT2L-GC6f-ICL-tTA2) | F   | 81                              | 3               | 1               | 24              | 23                        | 2527                       | 2954                             | 182                             | 50                             |
| M363887 | Vip-IRES-Cre      | Ai148(TIT2L-GC6f-ICL-tTA2) | M   | 82                              | 11              | 15              | 15              | 15                        | 2200                       | 1519                             | 182                             | 8                              |
| M365869 | Vip-IRES-Cre      | Ai148(TIT2L-GC6f-ICL-tTA2) | M   | 89                              | 6               | 13              | 20              | 20                        | 2076                       | 3000                             | 475                             | 0                              |
| M363890 | Vip-IRES-Cre      | Ai148(TIT2L-GC6f-ICL-tTA2) | F   | 103                             | 11              | 1               | 7               | 6                         | 724                        | 846                              | 104                             | 0                              |
| M385947 | Vip-IRES-Cre      | Ai148(TIT2L-GC6f-ICL-tTA2) | M   | 102                             | 5               | 12              | 13              | 13                        | 2238                       | 700                              | 125                             | 4                              |

**Supplemental Table 1. Mice included in study**
